# Supplementary material for: Impact of glycemic traits, type 2 diabetes and metformin use on breast and prostate cancer risk: a Mendelian randomization study
Source: PubMed Central journal article supplement — BMJ Open Diabetes Res Care. 2019 Dec 29;7(1):e000872. doi: 10.1136/bmjdrc-2019-000872 (PMC6936416; doi:10.1136/bmjdrc-2019-000872), 2019-12-29

**Appendix 1: Information on the genetic instruments used in this Mendelian randomization study for the breast cancer analyses in Breast Cancer Association Consortium**

| SNP        | Exposure | EA | OA | EAF    | Beta/Log odds | SE     | Log odds (Overall) | SE (Overall) | Log odds (Positive) | SE (Positive) | Log odds (Negative) | SE (Negative) | Fstat  |
|------------|----------|----|----|--------|---------------|--------|--------------------|--------------|---------------------|---------------|---------------------|---------------|--------|
| rs1046896  | HbA1c    | T  | C  | 0.3162 | 0.028         | 0.0017 | 0.0053             | 0.0068       | 0.0058              | 0.0081        | 0.0075              | 0.0123        | 271.28 |
| rs10830963 | HbA1c    | G  | C  | 0.2938 | 0.02          | 0.002  | 0.008              | 0.0075       | 0.0032              | 0.0089        | 3.00E-04            | 0.0138        | 100    |
| rs11248914 | HbA1c    | T  | C  | 0.647  | 0.014         | 0.0019 | 0.0074             | 0.0068       | 0.0129              | 0.0081        | 0.0111              | 0.0123        | 54.29  |
| rs11558471 | HbA1c    | A  | G  | 0.6745 | 0.015         | 0.0017 | 0.0155             | 0.0067       | 0.018               | 0.008         | 0.0173              | 0.0122        | 77.85  |
| rs11603334 | HbA1c    | G  | A  | 0.815  | 0.012         | 0.0021 | -0.0167            | 0.0086       | -0.0173             | 0.0103        | -0.0116             | 0.0158        | 32.65  |
| rs11708067 | HbA1c    | A  | G  | 0.7542 | 0.013         | 0.0019 | 0.0035             | 0.0075       | 0.0064              | 0.0089        | 0.0074              | 0.0137        | 46.81  |
| rs11964178 | HbA1c    | A  | G  | 0.5666 | 0.01          | 0.0016 | 0.0056             | 0.0063       | 0.0061              | 0.0075        | -0.0016             | 0.0114        | 39.06  |
| rs12621844 | HbA1c    | T  | C  | 0.5999 | 0.01          | 0.0018 | -0.0045            | 0.0064       | -0.0072             | 0.0077        | 0.0323              | 0.0118        | 30.86  |
| rs13134327 | HbA1c    | A  | G  | 0.3335 | 0.013         | 0.0017 | -6.00E-04          | 0.007        | -0.0088             | 0.0083        | -0.0068             | 0.0127        | 58.48  |
| rs1558902  | HbA1c    | A  | T  | 0.4128 | 0.01          | 0.0019 | -0.0623            | 0.0063       | -0.0593             | 0.0075        | -0.0781             | 0.0115        | 27.7   |
| rs17509001 | HbA1c    | C  | T  | 0.1576 | 0.018         | 0.0023 | -0.0126            | 0.009        | -0.0036             | 0.0108        | -0.03               | 0.0167        | 61.25  |
| rs17533903 | HbA1c    | A  | G  | 0.2428 | 0.015         | 0.0022 | 0.0133             | 0.0077       | 0.0095              | 0.0092        | 0.0198              | 0.014         | 46.49  |
| rs17747324 | HbA1c    | C  | T  | 0.2489 | 0.015         | 0.0023 | 0.0332             | 0.0074       | 0.0308              | 0.0089        | 0.0411              | 0.0136        | 42.53  |
| rs2383208  | HbA1c    | A  | G  | 0.7992 | 0.014         | 0.0021 | -0.0146            | 0.0081       | -0.0112             | 0.0097        | -0.0111             | 0.0147        | 44.44  |
| rs267738   | HbA1c    | T  | G  | 0.7701 | 0.011         | 0.0019 | -0.0182            | 0.0076       | -0.0076             | 0.009         | -0.0367             | 0.0138        | 33.52  |
| rs282587   | HbA1c    | G  | A  | 0.1513 | 0.019         | 0.0027 | -3.00E-04          | 0.0099       | -0.001              | 0.0117        | 0.0094              | 0.0179        | 49.52  |
| rs3782123  | HbA1c    | C  | A  | 0.3205 | 0.013         | 0.002  | -0.0096            | 0.0069       | -0.0083             | 0.0083        | -0.002              | 0.0126        | 42.25  |
| rs4607517  | HbA1c    | A  | G  | 0.2017 | 0.031         | 0.0024 | -5.00E-04          | 0.0089       | 0.0012              | 0.0107        | 0.0172              | 0.016         | 166.84 |
| rs4737009  | HbA1c    | A  | G  | 0.2531 | 0.021         | 0.002  | 0.0047             | 0.0079       | 0.0116              | 0.0093        | -0.0189             | 0.0142        | 110.25 |
| rs4745982  | HbA1c    | T  | G  | 0.8726 | 0.095         | 0.0056 | 0.0055             | 0.0129       | -0.003              | 0.0154        | 0.0212              | 0.0238        | 287.79 |
| rs4820268  | HbA1c    | G  | A  | 0.4606 | 0.016         | 0.0017 | -0.0026            | 0.0064       | -0.006              | 0.0076        | 0.0087              | 0.0116        | 88.58  |
| rs560887   | HbA1c    | C  | T  | 0.6843 | 0.028         | 0.0018 | -0.0062            | 0.0072       | -0.0019             | 0.0086        | 0.0019              | 0.013         | 241.98 |
| rs579459   | HbA1c    | C  | T  | 0.2389 | 0.011         | 0.0019 | 0.0374             | 0.0075       | 0.0398              | 0.009         | 0.0276              | 0.0137        | 33.52  |
| rs592423   | HbA1c    | A  | C  | 0.4566 | 0.009         | 0.0017 | 0.0029             | 0.0062       | 0.0077              | 0.0074        | -0.0138             | 0.0113        | 28.03  |
| rs6474359  | HbA1c    | T  | C  | 0.953  | 0.044         | 0.0053 | -0.0029            | 0.0186       | 0.0229              | 0.0224        | -0.0259             | 0.0336        | 68.92  |

|            |         |   |   |        |        |        |           |        |          |        |           |        |        |
|------------|---------|---|---|--------|--------|--------|-----------|--------|----------|--------|-----------|--------|--------|
| rs7040409  | HbA1c   | C | G | 0.8953 | 0.028  | 0.0037 | 0.0045    | 0.0131 | 0.0027   | 0.0157 | 0.0224    | 0.024  | 57.27  |
| rs7616006  | HbA1c   | A | G | 0.5744 | 0.01   | 0.0017 | 0.015     | 0.0064 | 0.0179   | 0.0077 | 0.0078    | 0.0117 | 34.6   |
| rs8192675  | HbA1c   | T | C | 0.6906 | 0.011  | 0.0017 | -0.0105   | 0.0071 | 1.00E-04 | 0.0085 | -0.0447   | 0.0128 | 41.87  |
| rs837763   | HbA1c   | T | C | 0.5548 | 0.017  | 0.0016 | 0.0114    | 0.0066 | 0.0094   | 0.0078 | 0.0142    | 0.0119 | 112.89 |
| rs857691   | HbA1c   | T | C | 0.2715 | 0.019  | 0.0019 | 0.0035    | 0.0074 | 9.00E-04 | 0.0089 | 0.0448    | 0.0134 | 100    |
| rs9818758  | HbA1c   | A | G | 0.2028 | 0.012  | 0.002  | -0.0273   | 0.0083 | -0.0382  | 0.0099 | -0.0409   | 0.0153 | 36     |
| rs9914988  | HbA1c   | A | G | 0.7877 | 0.013  | 0.002  | -0.0109   | 0.0078 | -0.0041  | 0.0093 | -0.0172   | 0.0141 | 42.25  |
| rs102275   | Glucose | C | T | 0.351  | -0.019 | 0.003  | -0.0069   | 0.0065 | 4.00E-04 | 0.0078 | -0.0301   | 0.0119 | 40.11  |
| rs10276674 | Glucose | C | T | 0.164  | 0.035  | 0.0043 | -0.0079   | 0.0082 | -0.0148  | 0.0098 | -7.00E-04 | 0.0149 | 66.25  |
| rs10814916 | Glucose | A | C | 0.434  | -0.019 | 0.003  | 0.0058    | 0.0065 | 8.00E-04 | 0.0078 | 0.0173    | 0.0118 | 40.11  |
| rs10830963 | Glucose | C | G | 0.7    | -0.074 | 0.0035 | -0.008    | 0.0075 | -0.0032  | 0.0089 | -3.00E-04 | 0.0138 | 447.02 |
| rs11195502 | Glucose | C | T | 0.925  | 0.035  | 0.0052 | 0.0195    | 0.0111 | 0.018    | 0.0133 | 0.0136    | 0.0204 | 45.3   |
| rs11619319 | Glucose | A | G | 0.788  | -0.021 | 0.0034 | 0.0033    | 0.0075 | 0.0035   | 0.0089 | -0.0106   | 0.0136 | 38.15  |
| rs11708067 | Glucose | A | G | 0.774  | 0.027  | 0.0033 | 0.0035    | 0.0075 | 0.0064   | 0.0089 | 0.0074    | 0.0137 | 66.94  |
| rs11924648 | Glucose | A | G | 0.863  | 0.029  | 0.0043 | -0.0149   | 0.0092 | -0.0056  | 0.0109 | -0.0272   | 0.0166 | 45.48  |
| rs12805422 | Glucose | A | G | 0.5    | -0.018 | 0.003  | 0.0041    | 0.0063 | 0.0101   | 0.0075 | -0.0013   | 0.0115 | 36     |
| rs2383208  | Glucose | A | G | 0.792  | 0.026  | 0.0035 | -0.0146   | 0.0081 | -0.0112  | 0.0097 | -0.0111   | 0.0147 | 55.18  |
| rs2979422  | Glucose | C | T | 0.133  | 0.022  | 0.004  | -0.002    | 0.0089 | 0.0071   | 0.0106 | 0.0049    | 0.0162 | 30.25  |
| rs340874   | Glucose | C | T | 0.562  | 0.02   | 0.0028 | -0.0185   | 0.0065 | -0.0238  | 0.0078 | -0.0245   | 0.0118 | 51.02  |
| rs3802177  | Glucose | A | G | 0.239  | -0.034 | 0.0031 | -0.0161   | 0.0067 | -0.0183  | 0.008  | -0.0182   | 0.0122 | 120.29 |
| rs4502156  | Glucose | C | T | 0.42   | -0.023 | 0.003  | 0.0163    | 0.0066 | 0.0121   | 0.0079 | 0.0369    | 0.012  | 58.78  |
| rs4506565  | Glucose | A | T | 0.704  | -0.019 | 0.0031 | -0.0338   | 0.0068 | -0.0283  | 0.0081 | -0.0437   | 0.0124 | 37.57  |
| rs4607517  | Glucose | A | G | 0.195  | 0.058  | 0.004  | -5.00E-04 | 0.0089 | 0.0012   | 0.0107 | 0.0172    | 0.016  | 210.25 |
| rs560887   | Glucose | C | T | 0.674  | 0.067  | 0.0033 | -0.0062   | 0.0072 | -0.0019  | 0.0086 | 0.0019    | 0.013  | 412.21 |
| rs7713317  | Glucose | A | G | 0.695  | 0.023  | 0.0031 | -0.0051   | 0.0072 | -0.0071  | 0.0086 | -0.005    | 0.013  | 55.05  |
| rs780094   | Glucose | C | T | 0.606  | 0.031  | 0.0029 | 0.0115    | 0.0063 | 0.0111   | 0.0076 | 0.0136    | 0.0115 | 114.27 |
| rs7944584  | Glucose | A | T | 0.712  | 0.024  | 0.0034 | 0.0302    | 0.0071 | 0.0275   | 0.0084 | 0.013     | 0.0128 | 49.83  |
| rs983309   | Glucose | G | T | 0.903  | -0.032 | 0.0044 | 0.0198    | 0.0101 | 0.0241   | 0.0121 | 0.0286    | 0.0186 | 52.89  |

|             |                 |   |   |        |            |            |           |        |          |        |           |        |        |
|-------------|-----------------|---|---|--------|------------|------------|-----------|--------|----------|--------|-----------|--------|--------|
| rs1005752   | Type 2 diabetes | A | C | 0.715  | 0.07696104 | 0.00705396 | 0.0134    | 0.0069 | 0.0143   | 0.0082 | 0.0041    | 0.0125 | 119.04 |
| rs10096633  | Type 2 diabetes | C | T | 0.877  | 0.06765865 | 0.00953764 | -0.016    | 0.0093 | -0.0188  | 0.0111 | -0.0284   | 0.0169 | 50.32  |
| rs10097617  | Type 2 diabetes | T | C | 0.485  | 0.03922071 | 0.00732401 | -7.00E-04 | 0.0062 | 0.0039   | 0.0075 | -5.00E-04 | 0.0114 | 28.68  |
| rs10193538  | Type 2 diabetes | T | G | 0.61   | 0.03922071 | 0.00739478 | 0.0014    | 0.0064 | 0.0047   | 0.0077 | 0.0091    | 0.0117 | 28.13  |
| rs10195252  | Type 2 diabetes | T | C | 0.586  | 0.06765865 | 0.0047684  | 0.0089    | 0.0062 | 3.00E-04 | 0.0075 | 0.0171    | 0.0114 | 201.33 |
| rs10228066  | Type 2 diabetes | T | C | 0.537  | 0.06765865 | 0.00711959 | -0.0035   | 0.0062 | -0.0024  | 0.0075 | 0.0106    | 0.0114 | 90.31  |
| rs10406431  | Type 2 diabetes | A | G | 0.563  | 0.04879016 | 0.00485923 | 0.0138    | 0.0063 | 0.0162   | 0.0075 | 0.0154    | 0.0116 | 100.82 |
| rs1061810   | Type 2 diabetes | A | C | 0.288  | 0.04879016 | 0.00725458 | 0.0063    | 0.0069 | 0.0071   | 0.0083 | -0.003    | 0.0126 | 45.23  |
| rs10750397  | Type 2 diabetes | A | G | 0.282  | 0.04879016 | 0.00725458 | -4.00E-04 | 0.0076 | 0.0034   | 0.0091 | 0.0013    | 0.0137 | 45.23  |
| rs10811660  | Type 2 diabetes | G | A | 0.828  | 0.2390169  | 0.0100844  | -0.0119   | 0.0081 | -0.0102  | 0.0097 | -0.0071   | 0.0148 | 561.77 |
| rs10830963  | Type 2 diabetes | G | C | 0.277  | 0.09531018 | 0.00692627 | 0.008     | 0.0075 | 0.0032   | 0.0089 | 3.00E-04  | 0.0138 | 189.36 |
| rs10882101  | Type 2 diabetes | T | C | 0.587  | 0.05826891 | 0.00962763 | -0.0045   | 0.0063 | -0.0036  | 0.0075 | 0.0082    | 0.0115 | 36.63  |
| rs10938398  | Type 2 diabetes | A | G | 0.429  | 0.04879016 | 0.00732401 | -0.0144   | 0.0063 | -0.0195  | 0.0075 | -0.0248   | 0.0114 | 44.38  |
| rs10954772  | Type 2 diabetes | T | C | 0.314  | 0.03922071 | 0.00732401 | 0.0072    | 0.0069 | 0.0126   | 0.0082 | 0.0062    | 0.0125 | 28.68  |
| rs10974438  | Type 2 diabetes | C | A | 0.357  | 0.04879016 | 0.00725458 | -0.0145   | 0.0069 | -0.0097  | 0.0082 | -0.0081   | 0.0124 | 45.23  |
| rs11257655  | Type 2 diabetes | T | C | 0.218  | 0.0861777  | 0.00698953 | -0.0148   | 0.0077 | -0.0253  | 0.0092 | 0.0041    | 0.0141 | 152.02 |
| rs1127215   | Type 2 diabetes | C | T | 0.584  | 0.04879016 | 0.00485923 | -0.0074   | 0.0066 | -0.0116  | 0.0077 | -0.0186   | 0.0118 | 100.82 |
| rs11496066  | Type 2 diabetes | T | C | 0.818  | 0.07696104 | 0.01417598 | -0.0132   | 0.0079 | -0.0178  | 0.0095 | -0.0063   | 0.0145 | 29.47  |
| rs115505614 | Type 2 diabetes | T | C | 0.0499 | 0.17395331 | 0.0150737  | -0.0096   | 0.0152 | 0.0072   | 0.0181 | -0.0812   | 0.0288 | 133.18 |
| rs11642430  | Type 2 diabetes | G | C | 0.399  | 0.03922071 | 0.00490596 | 8.00E-04  | 0.0063 | -0.0025  | 0.0075 | 0.0176    | 0.0115 | 63.91  |
| rs11680058  | Type 2 diabetes | A | G | 0.863  | 0.05826891 | 0.00962763 | 0.0202    | 0.011  | -0.0045  | 0.0131 | 0.0337    | 0.0201 | 36.63  |
| rs11688682  | Type 2 diabetes | G | C | 0.728  | 0.04879016 | 0.00732401 | -0.0205   | 0.0078 | -0.0245  | 0.0092 | -0.0162   | 0.0141 | 44.38  |
| rs11699802  | Type 2 diabetes | C | T | 0.536  | 0.03922071 | 0.00732401 | -0.0054   | 0.0065 | 0.0023   | 0.0078 | -0.0194   | 0.0119 | 28.68  |
| rs117001013 | Type 2 diabetes | C | T | 0.912  | 0.06765865 | 0.01197882 | 0.001     | 0.0118 | 7.00E-04 | 0.0142 | -0.0022   | 0.0219 | 31.9   |
| rs11708067  | Type 2 diabetes | A | G | 0.772  | 0.0861777  | 0.00698953 | 0.0035    | 0.0075 | 0.0064   | 0.0089 | 0.0074    | 0.0137 | 152.02 |
| rs11709077  | Type 2 diabetes | G | A | 0.877  | 0.13102826 | 0.01123979 | 0.0172    | 0.0094 | 0.027    | 0.0113 | -0.0168   | 0.0171 | 135.9  |
| rs11759026  | Type 2 diabetes | G | A | 0.232  | 0.06765865 | 0.00718645 | 7.00E-04  | 0.0074 | 0.0061   | 0.0089 | -0.0192   | 0.0137 | 88.64  |
| rs11842871  | Type 2 diabetes | G | T | 0.735  | 0.03922071 | 0.00732401 | 0.0132    | 0.0083 | 0.008    | 0.0099 | 0.0146    | 0.0149 | 28.68  |

|             |                 |   |   |        |            |            |         |        |          |        |          |        |        |
|-------------|-----------------|---|---|--------|------------|------------|---------|--------|----------|--------|----------|--------|--------|
| rs12001437  | Type 2 diabetes | C | T | 0.372  | 0.03922071 | 0.00732401 | 0.0054  | 0.0064 | 0.0073   | 0.0076 | 0.0068   | 0.0117 | 28.68  |
| rs12140153  | Type 2 diabetes | G | T | 0.905  | 0.06765865 | 0.01197882 | -0.0121 | 0.0116 | -0.0286  | 0.0139 | 0.0244   | 0.0216 | 31.9   |
| rs1260326   | Type 2 diabetes | C | T | 0.607  | 0.06765865 | 0.0047684  | 0.0106  | 0.0064 | 0.0101   | 0.0076 | 0.0102   | 0.0116 | 201.33 |
| rs12640250  | Type 2 diabetes | C | A | 0.715  | 0.03922071 | 0.00490596 | -0.0094 | 0.007  | -0.0062  | 0.0084 | -0.0161  | 0.0129 | 63.91  |
| rs12719778  | Type 2 diabetes | T | C | 0.538  | 0.03922071 | 0.00490596 | -0.0078 | 0.0065 | -0.0032  | 0.0078 | -0.0256  | 0.0118 | 63.91  |
| rs12920022  | Type 2 diabetes | A | T | 0.158  | 0.04879016 | 0.00725458 | -0.0179 | 0.009  | -0.0212  | 0.0107 | -0.0031  | 0.0164 | 45.23  |
| rs1296328   | Type 2 diabetes | A | C | 0.446  | 0.03922071 | 0.00739478 | -0.0028 | 0.0064 | -0.005   | 0.0077 | -0.0165  | 0.0117 | 28.13  |
| rs13041756  | Type 2 diabetes | C | T | 0.107  | 0.05826891 | 0.00962763 | -0.0134 | 0.0106 | -0.0187  | 0.0126 | -0.0038  | 0.0193 | 36.63  |
| rs13262861  | Type 2 diabetes | C | A | 0.829  | 0.06765865 | 0.00953764 | 0.0099  | 0.0083 | 0.0073   | 0.0099 | 0.0095   | 0.015  | 50.32  |
| rs13426680  | Type 2 diabetes | A | G | 0.937  | 0.0861777  | 0.01175794 | -0.0214 | 0.0129 | -0.026   | 0.0154 | -0.0296  | 0.0237 | 53.72  |
| rs1359790   | Type 2 diabetes | G | A | 0.72   | 0.0861777  | 0.00705396 | -0.0049 | 0.0072 | -0.0071  | 0.0085 | 0.0166   | 0.0131 | 149.25 |
| rs1377807   | Type 2 diabetes | C | G | 0.312  | 0.04879016 | 0.00725458 | 0.0028  | 0.0067 | 0.0077   | 0.008  | -0.0138  | 0.0123 | 45.23  |
| rs1412234   | Type 2 diabetes | C | T | 0.323  | 0.03922071 | 0.00732401 | -0.0031 | 0.0067 | 8.00E-04 | 0.008  | -0.0107  | 0.0123 | 28.68  |
| rs141521721 | Type 2 diabetes | A | C | 0.0236 | 0.12221763 | 0.02041906 | -0.013  | 0.0228 | -0.0146  | 0.027  | 0.0089   | 0.042  | 35.83  |
| rs1421085   | Type 2 diabetes | C | T | 0.415  | 0.12221763 | 0.00674318 | -0.0622 | 0.0063 | -0.0591  | 0.0075 | -0.0778  | 0.0115 | 328.5  |
| rs145678014 | Type 2 diabetes | G | T | 0.957  | 0.10436002 | 0.01616572 | -0.0056 | 0.0167 | 0.007    | 0.0199 | -0.0173  | 0.0305 | 41.68  |
| rs145904381 | Type 2 diabetes | T | C | 0.987  | 0.17395331 | 0.03004669 | -0.0654 | 0.0311 | -0.0487  | 0.0376 | -0.1275  | 0.0584 | 33.52  |
| rs1493694   | Type 2 diabetes | T | C | 0.109  | 0.0861777  | 0.00936259 | 0.0373  | 0.0102 | 0.0448   | 0.012  | 0.0473   | 0.0183 | 84.72  |
| rs1531583   | Type 2 diabetes | T | G | 0.0458 | 0.12221763 | 0.01587814 | 0.0437  | 0.0168 | 0.0447   | 0.02   | 0.0438   | 0.0307 | 59.25  |
| rs1561927   | Type 2 diabetes | C | T | 0.269  | 0.03922071 | 0.00732401 | 0.0013  | 0.0069 | 0.006    | 0.0083 | -0.0083  | 0.0127 | 28.68  |
| rs1562396   | Type 2 diabetes | G | A | 0.319  | 0.05826891 | 0.00718645 | -0.0165 | 0.0072 | -0.0277  | 0.0086 | 4.00E-04 | 0.0129 | 65.74  |
| rs1580278   | Type 2 diabetes | C | A | 0.473  | 0.03922071 | 0.00490596 | 0.0136  | 0.0063 | 0.0196   | 0.0075 | -0.0045  | 0.0115 | 63.91  |
| rs1708302   | Type 2 diabetes | C | T | 0.512  | 0.09531018 | 0.00698953 | -0.0223 | 0.0062 | -0.0333  | 0.0074 | -0.0065  | 0.0113 | 185.94 |
| rs17122772  | Type 2 diabetes | G | C | 0.228  | 0.03922071 | 0.00732401 | -0.0025 | 0.0079 | 0.0067   | 0.0094 | -0.0119  | 0.0144 | 28.68  |
| rs17168486  | Type 2 diabetes | T | C | 0.181  | 0.06765865 | 0.00711959 | -0.0108 | 0.0084 | -0.0158  | 0.01   | -0.0069  | 0.0152 | 90.31  |
| rs17250977  | Type 2 diabetes | G | A | 0.0376 | 0.11332869 | 0.01587814 | -0.0078 | 0.0232 | 0.0028   | 0.0277 | -0.0511  | 0.0429 | 50.94  |
| rs17522122  | Type 2 diabetes | T | G | 0.474  | 0.03922071 | 0.00490596 | -0.0074 | 0.0065 | -0.0052  | 0.0077 | 0.0073   | 0.0116 | 63.91  |
| rs17684074  | Type 2 diabetes | G | C | 0.74   | 0.03922071 | 0.00732401 | -0.0039 | 0.0073 | 0.0038   | 0.0087 | -0.0214  | 0.0132 | 28.68  |

|             |                 |   |   |        |            |            |          |        |           |        |          |        |        |
|-------------|-----------------|---|---|--------|------------|------------|----------|--------|-----------|--------|----------|--------|--------|
| rs17772814  | Type 2 diabetes | G | A | 0.915  | 0.07696104 | 0.01417598 | -0.0059  | 0.0116 | 0.0021    | 0.0136 | -0.0064  | 0.0217 | 29.47  |
| rs17791513  | Type 2 diabetes | A | G | 0.932  | 0.09531018 | 0.01154505 | 0.0307   | 0.0127 | 0.0409    | 0.0152 | 0.0283   | 0.0236 | 68.15  |
| rs1783541   | Type 2 diabetes | T | C | 0.204  | 0.05826891 | 0.00718645 | 0.0196   | 0.008  | 0.0147    | 0.0096 | 0.0168   | 0.0146 | 65.74  |
| rs17836088  | Type 2 diabetes | C | G | 0.217  | 0.05826891 | 0.00962763 | 0.0138   | 0.0076 | 0.0155    | 0.0091 | 0.012    | 0.0139 | 36.63  |
| rs1800961   | Type 2 diabetes | T | C | 0.0353 | 0.16551444 | 0.01715618 | -0.0327  | 0.0175 | -0.0272   | 0.0208 | -0.0573  | 0.0334 | 93.07  |
| rs184509201 | Type 2 diabetes | C | G | 0.982  | 0.19062036 | 0.02532014 | 0.0146   | 0.0229 | 0.0314    | 0.0271 | -0.032   | 0.0419 | 56.68  |
| rs2102278   | Type 2 diabetes | G | A | 0.319  | 0.03922071 | 0.00739478 | 0.02     | 0.0069 | 0.0145    | 0.0083 | 0.0194   | 0.0126 | 28.13  |
| rs2237895   | Type 2 diabetes | C | A | 0.426  | 0.11332869 | 0.00680312 | 0.0047   | 0.0068 | 0.0065    | 0.0081 | 0.0087   | 0.0124 | 277.5  |
| rs2268078   | Type 2 diabetes | A | G | 0.657  | 0.03922071 | 0.00732401 | -0.0132  | 0.0066 | 3.00E-04  | 0.0079 | -0.029   | 0.0121 | 28.68  |
| rs2272163   | Type 2 diabetes | C | A | 0.618  | 0.03922071 | 0.00739478 | 0.0083   | 0.0069 | 0.0027    | 0.0082 | 0.0113   | 0.0124 | 28.13  |
| rs2283220   | Type 2 diabetes | A | G | 0.69   | 0.04879016 | 0.00732401 | 0.0085   | 0.0072 | 0.0155    | 0.0087 | 0.0199   | 0.0131 | 44.38  |
| rs2307111   | Type 2 diabetes | T | C | 0.605  | 0.04879016 | 0.00725458 | -0.0162  | 0.0063 | -0.0128   | 0.0075 | -0.0247  | 0.0115 | 45.23  |
| rs243024    | Type 2 diabetes | A | G | 0.46   | 0.05826891 | 0.00481339 | 0.008    | 0.0062 | 0.007     | 0.0074 | 0.015    | 0.0113 | 146.55 |
| rs2796441   | Type 2 diabetes | G | A | 0.592  | 0.06765865 | 0.00718645 | -0.0108  | 0.0069 | -0.0096   | 0.0082 | -0.0112  | 0.0124 | 88.64  |
| rs28505901  | Type 2 diabetes | G | A | 0.752  | 0.0861777  | 0.00936259 | -0.0071  | 0.0081 | 0         | 0.0095 | -0.0244  | 0.0147 | 84.72  |
| rs2925979   | Type 2 diabetes | T | C | 0.3    | 0.04879016 | 0.00725458 | -0.008   | 0.0068 | -0.0018   | 0.0081 | 6.00E-04 | 0.0124 | 45.23  |
| rs2972144   | Type 2 diabetes | G | A | 0.639  | 0.09531018 | 0.00698953 | 0.0024   | 0.0065 | -2.00E-04 | 0.0077 | 0.0091   | 0.0118 | 185.94 |
| rs3111316   | Type 2 diabetes | A | G | 0.589  | 0.04879016 | 0.00732401 | -0.0234  | 0.0065 | -0.0206   | 0.0077 | -0.0066  | 0.0118 | 44.38  |
| rs329122    | Type 2 diabetes | A | G | 0.429  | 0.03922071 | 0.00490596 | -0.0022  | 0.0063 | -0.0036   | 0.0075 | 0.0132   | 0.0114 | 63.91  |
| rs340874    | Type 2 diabetes | C | T | 0.556  | 0.06765865 | 0.00718645 | -0.0185  | 0.0065 | -0.0238   | 0.0078 | -0.0245  | 0.0118 | 88.64  |
| rs34584161  | Type 2 diabetes | A | G | 0.76   | 0.04879016 | 0.00732401 | 0.0011   | 0.0073 | -8.00E-04 | 0.0087 | -0.001   | 0.0134 | 44.38  |
| rs34715063  | Type 2 diabetes | C | T | 0.124  | 0.09531018 | 0.01165052 | -0.0081  | 0.0108 | -0.0014   | 0.0129 | 0.0085   | 0.0197 | 66.92  |
| rs348330    | Type 2 diabetes | G | A | 0.361  | 0.04879016 | 0.00725458 | -0.0018  | 0.007  | 0.0024    | 0.0084 | 0.0049   | 0.0128 | 45.23  |
| rs35352848  | Type 2 diabetes | T | C | 0.788  | 0.06765865 | 0.00953764 | 0.0147   | 0.0077 | 0.012     | 0.0092 | 0.0066   | 0.0141 | 50.32  |
| rs35895680  | Type 2 diabetes | C | A | 0.678  | 0.05826891 | 0.00725458 | -0.0016  | 0.007  | -4.00E-04 | 0.0084 | 0.0047   | 0.0127 | 64.51  |
| rs35999103  | Type 2 diabetes | T | C | 0.155  | 0.04879016 | 0.00971935 | 0.005    | 0.0092 | 0.0108    | 0.011  | -0.018   | 0.0168 | 25.2   |
| rs3751837   | Type 2 diabetes | T | C | 0.22   | 0.03922071 | 0.00732401 | 3.00E-04 | 0.0078 | -6.00E-04 | 0.0093 | -0.0103  | 0.0142 | 28.68  |
| rs3768321   | Type 2 diabetes | T | G | 0.2    | 0.0861777  | 0.00705396 | 0.0164   | 0.0083 | 0.0154    | 0.0099 | 0.0167   | 0.015  | 149.25 |

|            |                 |   |   |        |            |            |         |        |           |        |           |        |        |
|------------|-----------------|---|---|--------|------------|------------|---------|--------|-----------|--------|-----------|--------|--------|
| rs3798519  | Type 2 diabetes | C | A | 0.184  | 0.05826891 | 0.00962763 | 0.0065  | 0.008  | 0.0163    | 0.0095 | -0.0409   | 0.0147 | 36.63  |
| rs3802177  | Type 2 diabetes | G | A | 0.685  | 0.10436002 | 0.00686415 | 0.0161  | 0.0067 | 0.0183    | 0.008  | 0.0182    | 0.0122 | 231.15 |
| rs3845281  | Type 2 diabetes | G | A | 0.904  | 0.07696104 | 0.0094493  | -0.0033 | 0.011  | -0.0148   | 0.0131 | -0.0302   | 0.02   | 66.33  |
| rs3887925  | Type 2 diabetes | T | C | 0.547  | 0.06765865 | 0.00718645 | -0.0227 | 0.0064 | -0.0172   | 0.0076 | -0.0276   | 0.0116 | 88.64  |
| rs429358   | Type 2 diabetes | T | C | 0.846  | 0.07696104 | 0.0094493  | 0.0232  | 0.0092 | 0.023     | 0.0109 | 0.014     | 0.0169 | 66.33  |
| rs4457053  | Type 2 diabetes | G | A | 0.304  | 0.05826891 | 0.00718645 | -0.0017 | 0.007  | -0.012    | 0.0084 | 0.0118    | 0.0127 | 65.74  |
| rs4688760  | Type 2 diabetes | T | C | 0.684  | 0.03922071 | 0.00732401 | 0.0012  | 0.0067 | 2.00E-04  | 0.008  | -2.00E-04 | 0.0122 | 28.68  |
| rs4709746  | Type 2 diabetes | C | T | 0.868  | 0.05826891 | 0.00962763 | -0.015  | 0.0104 | -0.0157   | 0.0124 | -0.0283   | 0.0186 | 36.63  |
| rs474513   | Type 2 diabetes | A | G | 0.517  | 0.03922071 | 0.00490596 | -0.0061 | 0.0062 | -0.0106   | 0.0074 | -0.0036   | 0.0113 | 63.91  |
| rs4804833  | Type 2 diabetes | A | G | 0.39   | 0.04879016 | 0.00732401 | -0.0086 | 0.0064 | -0.0046   | 0.0076 | 0.0038    | 0.0115 | 44.38  |
| rs4925109  | Type 2 diabetes | A | G | 0.316  | 0.04879016 | 0.00732401 | 0.0139  | 0.0066 | 0.0194    | 0.0079 | 0.0123    | 0.012  | 44.38  |
| rs4929965  | Type 2 diabetes | A | G | 0.383  | 0.06765865 | 0.00711959 | 0.006   | 0.0064 | 0.0053    | 0.0076 | -0.0019   | 0.0116 | 90.31  |
| rs4932265  | Type 2 diabetes | T | C | 0.267  | 0.06765865 | 0.00718645 | 0.0027  | 0.0078 | -5.00E-04 | 0.0093 | 0.0191    | 0.014  | 88.64  |
| rs4946812  | Type 2 diabetes | G | A | 0.674  | 0.03922071 | 0.00490596 | -0.0067 | 0.0076 | -0.0111   | 0.009  | -0.0041   | 0.0137 | 63.91  |
| rs4977213  | Type 2 diabetes | C | T | 0.375  | 0.04879016 | 0.00725458 | 0.0031  | 0.0075 | 0.0093    | 0.009  | -0.0175   | 0.0134 | 45.23  |
| rs5213     | Type 2 diabetes | C | T | 0.362  | 0.06765865 | 0.00711959 | -0.0115 | 0.0064 | -0.0133   | 0.0077 | -0.0056   | 0.0117 | 90.31  |
| rs539515   | Type 2 diabetes | C | A | 0.198  | 0.04879016 | 0.00725458 | -0.0303 | 0.0079 | -0.0254   | 0.0094 | -0.0164   | 0.0144 | 45.23  |
| rs55653563 | Type 2 diabetes | A | C | 0.732  | 0.03922071 | 0.00732401 | 0.0115  | 0.007  | 0.0168    | 0.0084 | 0.0309    | 0.0128 | 28.68  |
| rs56337234 | Type 2 diabetes | C | T | 0.503  | 0.05826891 | 0.00725458 | -0.0138 | 0.0066 | -0.0175   | 0.0079 | -0.0172   | 0.0122 | 64.51  |
| rs58432198 | Type 2 diabetes | C | T | 0.881  | 0.06765865 | 0.00953764 | -0.0106 | 0.0099 | -0.008    | 0.0118 | -0.021    | 0.018  | 50.32  |
| rs58730668 | Type 2 diabetes | T | C | 0.858  | 0.06765865 | 0.00953764 | 0.0028  | 0.0093 | -0.0058   | 0.0111 | 0.0231    | 0.0169 | 50.32  |
| rs601945   | Type 2 diabetes | G | A | 0.178  | 0.05826891 | 0.00962763 | -0.0197 | 0.0085 | -0.0311   | 0.0102 | -2.00E-04 | 0.0161 | 36.63  |
| rs60276348 | Type 2 diabetes | T | C | 0.14   | 0.04879016 | 0.00971935 | 0.0189  | 0.0104 | 0.0205    | 0.0125 | 0.0247    | 0.0189 | 25.2   |
| rs61676547 | Type 2 diabetes | C | G | 0.192  | 0.05826891 | 0.00725458 | 0.0015  | 0.0077 | -0.0022   | 0.0092 | 0.0203    | 0.014  | 64.51  |
| rs62007683 | Type 2 diabetes | G | T | 0.653  | 0.03922071 | 0.00739478 | -0.0094 | 0.0067 | -0.0114   | 0.008  | -0.0035   | 0.0122 | 28.13  |
| rs62080313 | Type 2 diabetes | C | T | 0.123  | 0.05826891 | 0.00962763 | 0.0015  | 0.0094 | 0.0065    | 0.0112 | -0.0196   | 0.0171 | 36.63  |
| rs62107261 | Type 2 diabetes | T | C | 0.954  | 0.11332869 | 0.01602064 | -0.0137 | 0.018  | -0.0322   | 0.0213 | -0.0133   | 0.0324 | 50.04  |
| rs62271373 | Type 2 diabetes | A | T | 0.0553 | 0.0861777  | 0.01404586 | -0.0119 | 0.0164 | -0.013    | 0.0196 | -3.00E-04 | 0.0293 | 37.64  |

|            |                 |   |   |        |            |            |           |        |           |        |         |        |        |
|------------|-----------------|---|---|--------|------------|------------|-----------|--------|-----------|--------|---------|--------|--------|
| rs6458354  | Type 2 diabetes | C | T | 0.289  | 0.04879016 | 0.00725458 | 0.0039    | 0.0069 | 0.0074    | 0.0082 | -0.0026 | 0.0124 | 45.23  |
| rs6459733  | Type 2 diabetes | G | C | 0.673  | 0.05826891 | 0.00481339 | -0.0106   | 0.0066 | -0.0127   | 0.0079 | -0.0054 | 0.0121 | 146.55 |
| rs6518681  | Type 2 diabetes | G | A | 0.914  | 0.0861777  | 0.01175794 | 0.0016    | 0.0115 | -0.0055   | 0.0137 | -0.0274 | 0.0207 | 53.72  |
| rs6600191  | Type 2 diabetes | T | C | 0.825  | 0.05826891 | 0.00718645 | 4.00E-04  | 0.0083 | -5.00E-04 | 0.0099 | 0.0158  | 0.015  | 65.74  |
| rs67232546 | Type 2 diabetes | T | C | 0.207  | 0.05826891 | 0.00725458 | 0.0117    | 0.0081 | 0.0076    | 0.0096 | 0.0356  | 0.0146 | 64.51  |
| rs6780171  | Type 2 diabetes | A | T | 0.314  | 0.13102826 | 0.00895187 | -0.0163   | 0.0067 | -0.0215   | 0.008  | -0.011  | 0.0122 | 214.24 |
| rs6821438  | Type 2 diabetes | A | G | 0.534  | 0.03922071 | 0.00732401 | 0.0121    | 0.0062 | 0.0122    | 0.0074 | 0.0346  | 0.0113 | 28.68  |
| rs6976111  | Type 2 diabetes | A | C | 0.313  | 0.03922071 | 0.00732401 | 0.0035    | 0.0067 | 0.013     | 0.008  | -0.0206 | 0.0123 | 28.68  |
| rs7022807  | Type 2 diabetes | G | A | 0.401  | 0.03922071 | 0.00490596 | -0.0076   | 0.0064 | -0.0095   | 0.0076 | -0.0084 | 0.0116 | 63.91  |
| rs702634   | Type 2 diabetes | A | G | 0.69   | 0.04879016 | 0.00725458 | 0.0161    | 0.0067 | 0.019     | 0.008  | -0.0014 | 0.0123 | 45.23  |
| rs71372253 | Type 2 diabetes | C | T | 0.0642 | 0.07696104 | 0.01186735 | -0.0357   | 0.0133 | -0.0304   | 0.0158 | -0.03   | 0.0245 | 42.06  |
| rs7178762  | Type 2 diabetes | C | T | 0.46   | 0.03922071 | 0.00490596 | -0.0207   | 0.0065 | -0.0197   | 0.0077 | -0.0262 | 0.0117 | 63.91  |
| rs7222481  | Type 2 diabetes | C | G | 0.324  | 0.03922071 | 0.00490596 | -0.0107   | 0.0072 | -0.0099   | 0.0087 | -0.0178 | 0.0132 | 63.91  |
| rs7240767  | Type 2 diabetes | C | T | 0.376  | 0.03922071 | 0.00739478 | 0.0079    | 0.0065 | 0.0082    | 0.0078 | 0.0049  | 0.0119 | 28.13  |
| rs72802342 | Type 2 diabetes | C | A | 0.923  | 0.15700375 | 0.01308502 | 0.0082    | 0.013  | -2.00E-04 | 0.0154 | 0.0132  | 0.0234 | 143.97 |
| rs72926932 | Type 2 diabetes | C | A | 0.0839 | 0.0861777  | 0.01165052 | -0.0123   | 0.0115 | -0.0139   | 0.0137 | -0.0135 | 0.0211 | 54.71  |
| rs738408   | Type 2 diabetes | T | C | 0.226  | 0.04879016 | 0.00971935 | -0.0037   | 0.0077 | -0.0019   | 0.0092 | -0.0214 | 0.0141 | 25.2   |
| rs7629630  | Type 2 diabetes | A | T | 0.857  | 0.04879016 | 0.00971935 | -7.00E-04 | 0.0097 | 0.0036    | 0.0116 | -0.0087 | 0.0174 | 25.2   |
| rs7669833  | Type 2 diabetes | T | A | 0.705  | 0.05826891 | 0.00725458 | -7.00E-04 | 0.007  | 0.0032    | 0.0083 | -0.0164 | 0.0127 | 64.51  |
| rs7719891  | Type 2 diabetes | G | A | 0.259  | 0.03922071 | 0.00732401 | 0.006     | 0.0072 | 0.0089    | 0.0086 | -0.0046 | 0.0131 | 28.68  |
| rs77464186 | Type 2 diabetes | A | C | 0.836  | 0.10436002 | 0.00919386 | -0.0147   | 0.0086 | -0.0129   | 0.0103 | -0.0129 | 0.0158 | 128.85 |
| rs7756992  | Type 2 diabetes | G | A | 0.274  | 0.13976194 | 0.00887401 | 0.0127    | 0.0069 | 0.0166    | 0.0082 | -0.012  | 0.0126 | 248.05 |
| rs7903146  | Type 2 diabetes | T | C | 0.295  | 0.31481074 | 0.00744876 | 0.0364    | 0.0069 | 0.0309    | 0.0083 | 0.039   | 0.0126 | 1786.2 |
| rs7987740  | Type 2 diabetes | T | C | 0.609  | 0.03922071 | 0.00739478 | 5.00E-04  | 0.0065 | -0.0059   | 0.0078 | 0.0096  | 0.0116 | 28.13  |
| rs8010382  | Type 2 diabetes | G | A | 0.421  | 0.03922071 | 0.00490596 | 0.0162    | 0.0063 | 0.0093    | 0.0075 | 0.0126  | 0.0115 | 63.91  |
| rs80147536 | Type 2 diabetes | A | T | 0.904  | 0.12221763 | 0.01123979 | -0.0194   | 0.0104 | -0.0227   | 0.0125 | -0.0349 | 0.0189 | 118.24 |
| rs8107974  | Type 2 diabetes | T | A | 0.0769 | 0.09531018 | 0.01165052 | 0.0174    | 0.0115 | 0.0251    | 0.0138 | 0.024   | 0.0211 | 66.92  |
| rs878521   | Type 2 diabetes | A | G | 0.245  | 0.05826891 | 0.00725458 | -8.00E-04 | 0.0077 | -0.0053   | 0.0092 | 0.0067  | 0.0139 | 64.51  |

|           |                 |   |   |       |            |            |         |        |          |        |          |        |       |
|-----------|-----------------|---|---|-------|------------|------------|---------|--------|----------|--------|----------|--------|-------|
| rs9379084 | Type 2 diabetes | G | A | 0.887 | 0.10436002 | 0.01154505 | -0.0486 | 0.0103 | -0.0506  | 0.0122 | -0.0478  | 0.0185 | 81.71 |
| rs9494624 | Type 2 diabetes | A | G | 0.29  | 0.03922071 | 0.00732401 | 0.0096  | 0.0075 | 0.017    | 0.009  | -0.0034  | 0.0135 | 28.68 |
| rs9563615 | Type 2 diabetes | A | T | 0.71  | 0.04879016 | 0.00732401 | 0.0083  | 0.0069 | 0.0181   | 0.0082 | 0.0074   | 0.0125 | 44.38 |
| rs9687832 | Type 2 diabetes | A | G | 0.198 | 0.07696104 | 0.0094493  | -0.0203 | 0.0081 | -0.0284  | 0.0097 | -0.0099  | 0.0147 | 66.33 |
| rs9860730 | Type 2 diabetes | A | G | 0.704 | 0.05826891 | 0.00725458 | -0.0055 | 0.0068 | -0.0055  | 0.0081 | 0.0048   | 0.0123 | 64.51 |
| rs9873618 | Type 2 diabetes | G | A | 0.71  | 0.06765865 | 0.00718645 | -0.0112 | 0.0072 | 4.00E-04 | 0.0086 | -0.0436  | 0.0129 | 88.64 |
| rs9957145 | Type 2 diabetes | G | A | 0.829 | 0.04879016 | 0.00971935 | -0.0078 | 0.0083 | -0.0126  | 0.0099 | 3.00E-04 | 0.0152 | 25.2  |

EA: Effect allele; EAF: Effect allele frequency; Fstat: F statistics; OA: Other allele; SE: Standard error; SNP: Single nucleotide polymorphism



## Appendix 2: Information on the genetic instruments used in this Mendelian randomization study for the breast cancer analyses in UK Biobank

| SNP        | Exposure | EA | OA | EAF    | Beta/Log odds | SE     | Log odds (Overall) | SE (Overall) | Fstat  |
|------------|----------|----|----|--------|---------------|--------|--------------------|--------------|--------|
| rs1046896  | HbA1c    | T  | C  | 0.3162 | 0.028         | 0.0017 | 0.02532379         | 0.01430374   | 271.28 |
| rs10774625 | HbA1c    | G  | A  | 0.5056 | 0.009         | 0.0016 | 0.06207209         | 0.01326543   | 31.64  |
| rs10830963 | HbA1c    | G  | C  | 0.2938 | 0.02          | 0.002  | 0.00767343         | 0.01486946   | 100    |
| rs11248914 | HbA1c    | T  | C  | 0.647  | 0.014         | 0.0019 | -0.0004604         | 0.01410776   | 54.29  |
| rs11558471 | HbA1c    | A  | G  | 0.6745 | 0.015         | 0.0017 | 0.01926041         | 0.01426117   | 77.85  |
| rs11603334 | HbA1c    | G  | A  | 0.815  | 0.012         | 0.0021 | -0.0459523         | 0.01834824   | 32.65  |
| rs11708067 | HbA1c    | A  | G  | 0.7542 | 0.013         | 0.0019 | 0.02195279         | 0.01539882   | 46.81  |
| rs11964178 | HbA1c    | A  | G  | 0.5666 | 0.01          | 0.0016 | 0.00440332         | 0.01340389   | 39.06  |
| rs12621844 | HbA1c    | T  | C  | 0.5999 | 0.01          | 0.0018 | -0.0324197         | 0.01368679   | 30.86  |
| rs13134327 | HbA1c    | A  | G  | 0.3335 | 0.013         | 0.0017 | -0.0077569         | 0.01425985   | 58.48  |
| rs1558902  | HbA1c    | A  | T  | 0.4128 | 0.01          | 0.0019 | -0.0740661         | 0.01354091   | 27.7   |
| rs17509001 | HbA1c    | C  | T  | 0.1576 | 0.018         | 0.0023 | -0.0383987         | 0.01883296   | 61.25  |
| rs17533903 | HbA1c    | A  | G  | 0.2428 | 0.015         | 0.0022 | 0.02841572         | 0.0164855    | 46.49  |
| rs17747324 | HbA1c    | C  | T  | 0.2489 | 0.015         | 0.0023 | 0.01251447         | 0.01589404   | 42.53  |
| rs2110073  | HbA1c    | T  | C  | 0.1097 | 0.015         | 0.0028 | 0.02532068         | 0.02328942   | 28.7   |
| rs2383208  | HbA1c    | A  | G  | 0.7992 | 0.014         | 0.0021 | -0.0130012         | 0.0173114    | 44.44  |
| rs267738   | HbA1c    | T  | G  | 0.7701 | 0.011         | 0.0019 | -0.0099435         | 0.01596529   | 33.52  |
| rs282587   | HbA1c    | G  | A  | 0.1513 | 0.019         | 0.0027 | -0.0257171         | 0.02023635   | 49.52  |
| rs3782123  | HbA1c    | C  | A  | 0.3205 | 0.013         | 0.002  | 0.00244979         | 0.01506206   | 42.25  |
| rs4607517  | HbA1c    | A  | G  | 0.2017 | 0.031         | 0.0024 | -0.0325824         | 0.0173634    | 166.84 |
| rs4737009  | HbA1c    | A  | G  | 0.2531 | 0.021         | 0.002  | 0.00234405         | 0.01561064   | 110.25 |
| rs4745982  | HbA1c    | T  | G  | 0.8726 | 0.095         | 0.0056 | 0.02567874         | 0.02530798   | 287.79 |
| rs4820268  | HbA1c    | G  | A  | 0.4606 | 0.016         | 0.0017 | -0.0124075         | 0.01329665   | 88.58  |
| rs560887   | HbA1c    | C  | T  | 0.6843 | 0.028         | 0.0018 | 0.00130313         | 0.01448746   | 241.98 |
| rs579459   | HbA1c    | C  | T  | 0.2389 | 0.011         | 0.0019 | 0.04817141         | 0.01636897   | 33.52  |

|            |         |   |   |        |        |        |            |            |        |
|------------|---------|---|---|--------|--------|--------|------------|------------|--------|
| rs592423   | HbA1c   | A | C | 0.4566 | 0.009  | 0.0017 | -0.0002845 | 0.01333223 | 28.03  |
| rs6474359  | HbA1c   | T | C | 0.953  | 0.044  | 0.0053 | 0.0162183  | 0.03473053 | 68.92  |
| rs7040409  | HbA1c   | C | G | 0.8953 | 0.028  | 0.0037 | -0.0023996 | 0.02879151 | 57.27  |
| rs7616006  | HbA1c   | A | G | 0.5744 | 0.01   | 0.0017 | 0.03908628 | 0.01346561 | 34.6   |
| rs8192675  | HbA1c   | T | C | 0.6906 | 0.011  | 0.0017 | 0.01607875 | 0.0145958  | 41.87  |
| rs837763   | HbA1c   | T | C | 0.5548 | 0.017  | 0.0016 | 0.00650951 | 0.01335576 | 112.89 |
| rs857691   | HbA1c   | T | C | 0.2715 | 0.019  | 0.0019 | -0.0384074 | 0.01539601 | 100    |
| rs9818758  | HbA1c   | A | G | 0.2028 | 0.012  | 0.002  | -0.0305912 | 0.01762582 | 36     |
| rs9914988  | HbA1c   | A | G | 0.7877 | 0.013  | 0.002  | 0.01998472 | 0.01646603 | 42.25  |
| rs102275   | Glucose | C | T | 0.351  | -0.019 | 0.003  | 0.01267453 | 0.01388355 | 40.11  |
| rs10276674 | Glucose | C | T | 0.164  | 0.035  | 0.0043 | -0.0166178 | 0.01726452 | 66.25  |
| rs10814916 | Glucose | A | C | 0.434  | -0.019 | 0.003  | -0.0122143 | 0.01325956 | 40.11  |
| rs10830963 | Glucose | C | G | 0.7    | -0.074 | 0.0035 | -0.0076734 | 0.01486946 | 447.02 |
| rs11195502 | Glucose | C | T | 0.925  | 0.035  | 0.0052 | 0.05199744 | 0.02314088 | 45.3   |
| rs11619319 | Glucose | A | G | 0.788  | -0.021 | 0.0034 | -0.0105104 | 0.01604107 | 38.15  |
| rs11708067 | Glucose | A | G | 0.774  | 0.027  | 0.0033 | 0.02195279 | 0.01539882 | 66.94  |
| rs11924648 | Glucose | A | G | 0.863  | 0.029  | 0.0043 | 0.00371987 | 0.02010002 | 45.48  |
| rs12805422 | Glucose | A | G | 0.5    | -0.018 | 0.003  | -0.0065101 | 0.01337608 | 36     |
| rs2383208  | Glucose | A | G | 0.792  | 0.026  | 0.0035 | -0.0130012 | 0.0173114  | 55.18  |
| rs2979422  | Glucose | C | T | 0.133  | 0.022  | 0.004  | 0.03796557 | 0.0192611  | 30.25  |
| rs340874   | Glucose | C | T | 0.562  | 0.02   | 0.0028 | -0.0023698 | 0.01338905 | 51.02  |
| rs3802177  | Glucose | A | G | 0.239  | -0.034 | 0.0031 | -0.0218899 | 0.01436025 | 120.29 |
| rs4502156  | Glucose | C | T | 0.42   | -0.023 | 0.003  | -0.011857  | 0.01333963 | 58.78  |
| rs4506565  | Glucose | A | T | 0.704  | -0.019 | 0.0031 | -0.0134923 | 0.01430761 | 37.57  |
| rs4607517  | Glucose | A | G | 0.195  | 0.058  | 0.004  | -0.0325824 | 0.0173634  | 210.25 |
| rs560887   | Glucose | C | T | 0.674  | 0.067  | 0.0033 | 0.00130313 | 0.01448746 | 412.21 |
| rs7713317  | Glucose | A | G | 0.695  | 0.023  | 0.0031 | 0.00410961 | 0.01469987 | 55.05  |
| rs780094   | Glucose | C | T | 0.606  | 0.031  | 0.0029 | 0.00011327 | 0.01365014 | 114.27 |

|             |                 |   |   |        |            |            |            |            |        |
|-------------|-----------------|---|---|--------|------------|------------|------------|------------|--------|
| rs7944584   | Glucose         | A | T | 0.712  | 0.024      | 0.0034     | -0.0095226 | 0.01483161 | 49.83  |
| rs983309    | Glucose         | G | T | 0.903  | -0.032     | 0.0044     | 0.0600743  | 0.02054648 | 52.89  |
| rs1005752   | Type 2 diabetes | A | C | 0.715  | 0.07696104 | 0.00705396 | 0.01699676 | 0.01479324 | 119.04 |
| rs10096633  | Type 2 diabetes | C | T | 0.877  | 0.06765865 | 0.00953764 | 0.02174348 | 0.02018526 | 50.32  |
| rs10097617  | Type 2 diabetes | T | C | 0.485  | 0.03922071 | 0.00732401 | 0.00754442 | 0.01329049 | 28.68  |
| rs10193538  | Type 2 diabetes | T | G | 0.61   | 0.03922071 | 0.00739478 | -0.0206196 | 0.01369079 | 28.13  |
| rs10195252  | Type 2 diabetes | T | C | 0.586  | 0.06765865 | 0.0047684  | -0.0110616 | 0.01353304 | 201.33 |
| rs10228066  | Type 2 diabetes | T | C | 0.537  | 0.06765865 | 0.00711959 | 0.0012571  | 0.01333965 | 90.31  |
| rs10406431  | Type 2 diabetes | A | G | 0.563  | 0.04879016 | 0.00485923 | -0.0042485 | 0.01334646 | 100.82 |
| rs1061810   | Type 2 diabetes | A | C | 0.288  | 0.04879016 | 0.00725458 | 0.01347239 | 0.01458218 | 45.23  |
| rs10750397  | Type 2 diabetes | A | G | 0.282  | 0.04879016 | 0.00725458 | 0.00359369 | 0.01487903 | 45.23  |
| rs10811660  | Type 2 diabetes | G | A | 0.828  | 0.2390169  | 0.0100844  | -0.0145986 | 0.01749872 | 561.77 |
| rs10830963  | Type 2 diabetes | G | C | 0.277  | 0.09531018 | 0.00692627 | 0.00767343 | 0.01486946 | 189.36 |
| rs10842994  | Type 2 diabetes | C | T | 0.805  | 0.07696104 | 0.00711959 | 0.00317021 | 0.01666443 | 116.85 |
| rs10882101  | Type 2 diabetes | T | C | 0.587  | 0.05826891 | 0.00962763 | -0.0108151 | 0.01350371 | 36.63  |
| rs10938398  | Type 2 diabetes | A | G | 0.429  | 0.04879016 | 0.00732401 | -0.0125671 | 0.01345143 | 44.38  |
| rs10954772  | Type 2 diabetes | T | C | 0.314  | 0.03922071 | 0.00732401 | 0.00689477 | 0.01441815 | 28.68  |
| rs10974438  | Type 2 diabetes | C | A | 0.357  | 0.04879016 | 0.00725458 | 0.01645984 | 0.01392941 | 45.23  |
| rs11063028  | Type 2 diabetes | C | T | 0.18   | 0.05826891 | 0.00725458 | -0.0109384 | 0.01764748 | 64.51  |
| rs11257655  | Type 2 diabetes | T | C | 0.218  | 0.0861777  | 0.00698953 | -0.0055684 | 0.01632607 | 152.02 |
| rs1127215   | Type 2 diabetes | C | T | 0.584  | 0.04879016 | 0.00485923 | -0.0141059 | 0.01341672 | 100.82 |
| rs11496066  | Type 2 diabetes | T | C | 0.818  | 0.07696104 | 0.01417598 | -0.0064358 | 0.01702048 | 29.47  |
| rs115505614 | Type 2 diabetes | T | C | 0.0499 | 0.17395331 | 0.0150737  | 0.01692    | 0.03030449 | 133.18 |
| rs11642430  | Type 2 diabetes | G | C | 0.399  | 0.03922071 | 0.00490596 | -0.0081178 | 0.01352829 | 63.91  |
| rs11680058  | Type 2 diabetes | A | G | 0.863  | 0.05826891 | 0.00962763 | -0.0210889 | 0.02133744 | 36.63  |
| rs11688682  | Type 2 diabetes | G | C | 0.728  | 0.04879016 | 0.00732401 | -0.0233078 | 0.01544224 | 44.38  |
| rs11699802  | Type 2 diabetes | C | T | 0.536  | 0.03922071 | 0.00732401 | -0.0127142 | 0.01338002 | 28.68  |
| rs117001013 | Type 2 diabetes | C | T | 0.912  | 0.06765865 | 0.01197882 | 0.01948688 | 0.02351657 | 31.9   |

|             |                 |   |   |        |            |            |            |            |        |
|-------------|-----------------|---|---|--------|------------|------------|------------|------------|--------|
| rs11708067  | Type 2 diabetes | A | G | 0.772  | 0.0861777  | 0.00698953 | 0.02195279 | 0.01539882 | 152.02 |
| rs11709077  | Type 2 diabetes | G | A | 0.877  | 0.13102826 | 0.01123979 | 0.02464263 | 0.02049283 | 135.9  |
| rs11759026  | Type 2 diabetes | G | A | 0.232  | 0.06765865 | 0.00718645 | 0.01886769 | 0.01589556 | 88.64  |
| rs11842871  | Type 2 diabetes | G | T | 0.735  | 0.03922071 | 0.00732401 | 0.00681883 | 0.01510187 | 28.68  |
| rs12001437  | Type 2 diabetes | C | T | 0.372  | 0.03922071 | 0.00732401 | 0.01419006 | 0.01376418 | 28.68  |
| rs12140153  | Type 2 diabetes | G | T | 0.905  | 0.06765865 | 0.01197882 | -0.0425909 | 0.02312156 | 31.9   |
| rs1260326   | Type 2 diabetes | C | T | 0.607  | 0.06765865 | 0.0047684  | 0.00224996 | 0.0135657  | 201.33 |
| rs12640250  | Type 2 diabetes | C | A | 0.715  | 0.03922071 | 0.00490596 | 0.01037487 | 0.01469111 | 63.91  |
| rs12719778  | Type 2 diabetes | T | C | 0.538  | 0.03922071 | 0.00490596 | -0.0118324 | 0.0132921  | 63.91  |
| rs12811407  | Type 2 diabetes | A | G | 0.331  | 0.04879016 | 0.00725458 | 0.02226146 | 0.01411636 | 45.23  |
| rs12920022  | Type 2 diabetes | A | T | 0.158  | 0.04879016 | 0.00725458 | -0.0112726 | 0.01833733 | 45.23  |
| rs1296328   | Type 2 diabetes | A | C | 0.446  | 0.03922071 | 0.00739478 | -0.0039464 | 0.01343215 | 28.13  |
| rs13041756  | Type 2 diabetes | C | T | 0.107  | 0.05826891 | 0.00962763 | 0.00310899 | 0.02167277 | 36.63  |
| rs13262861  | Type 2 diabetes | C | A | 0.829  | 0.06765865 | 0.00953764 | 0.00460426 | 0.01771995 | 50.32  |
| rs13426680  | Type 2 diabetes | A | G | 0.937  | 0.0861777  | 0.01175794 | -0.0163505 | 0.0269806  | 53.72  |
| rs1359790   | Type 2 diabetes | G | A | 0.72   | 0.0861777  | 0.00705396 | 0.00440368 | 0.01467359 | 149.25 |
| rs1377807   | Type 2 diabetes | C | G | 0.312  | 0.04879016 | 0.00725458 | -0.0058163 | 0.01428465 | 45.23  |
| rs1412234   | Type 2 diabetes | C | T | 0.323  | 0.03922071 | 0.00732401 | -0.0027819 | 0.01418643 | 28.68  |
| rs141521721 | Type 2 diabetes | A | C | 0.0236 | 0.12221763 | 0.02041906 | -0.0523934 | 0.04338577 | 35.83  |
| rs1421085   | Type 2 diabetes | C | T | 0.415  | 0.12221763 | 0.00674318 | -0.0738667 | 0.01354075 | 328.5  |
| rs1426371   | Type 2 diabetes | G | A | 0.739  | 0.04879016 | 0.00725458 | 0.02157141 | 0.01528805 | 45.23  |
| rs145678014 | Type 2 diabetes | G | T | 0.957  | 0.10436002 | 0.01616572 | 0.05568353 | 0.0322188  | 41.68  |
| rs145904381 | Type 2 diabetes | T | C | 0.987  | 0.17395331 | 0.03004669 | 0.01885394 | 0.06007396 | 33.52  |
| rs1493694   | Type 2 diabetes | T | C | 0.109  | 0.0861777  | 0.00936259 | 0.04919875 | 0.02140102 | 84.72  |
| rs1531583   | Type 2 diabetes | T | G | 0.0458 | 0.12221763 | 0.01587814 | -0.0439441 | 0.03429136 | 59.25  |
| rs1561927   | Type 2 diabetes | C | T | 0.269  | 0.03922071 | 0.00732401 | 0.00152648 | 0.01506312 | 28.68  |
| rs1562396   | Type 2 diabetes | G | A | 0.319  | 0.05826891 | 0.00718645 | -0.0352539 | 0.01425703 | 65.74  |
| rs1580278   | Type 2 diabetes | C | A | 0.473  | 0.03922071 | 0.00490596 | -0.0112953 | 0.01335521 | 63.91  |

|             |                 |   |   |        |            |            |            |            |        |
|-------------|-----------------|---|---|--------|------------|------------|------------|------------|--------|
| rs1708302   | Type 2 diabetes | C | T | 0.512  | 0.09531018 | 0.00698953 | 0.00927169 | 0.01325973 | 185.94 |
| rs17122772  | Type 2 diabetes | G | C | 0.228  | 0.03922071 | 0.00732401 | -0.0137126 | 0.01574409 | 28.68  |
| rs17168486  | Type 2 diabetes | T | C | 0.181  | 0.06765865 | 0.00711959 | -0.0070683 | 0.01757378 | 90.31  |
| rs17250977  | Type 2 diabetes | G | A | 0.0376 | 0.11332869 | 0.01587814 | 0.01434836 | 0.03386017 | 50.94  |
| rs17522122  | Type 2 diabetes | T | G | 0.474  | 0.03922071 | 0.00490596 | -0.0083878 | 0.0133475  | 63.91  |
| rs17684074  | Type 2 diabetes | G | C | 0.74   | 0.03922071 | 0.00732401 | 0.02364002 | 0.01536968 | 28.68  |
| rs17772814  | Type 2 diabetes | G | A | 0.915  | 0.07696104 | 0.01417598 | 0.00852455 | 0.02507195 | 29.47  |
| rs17791513  | Type 2 diabetes | A | G | 0.932  | 0.09531018 | 0.01154505 | 0.00203932 | 0.0275761  | 68.15  |
| rs1783541   | Type 2 diabetes | T | C | 0.204  | 0.05826891 | 0.00718645 | -0.0230811 | 0.01609371 | 65.74  |
| rs17836088  | Type 2 diabetes | C | G | 0.217  | 0.05826891 | 0.00962763 | 0.03077556 | 0.01597649 | 36.63  |
| rs1800961   | Type 2 diabetes | T | C | 0.0353 | 0.16551444 | 0.01715618 | -0.0213656 | 0.03825815 | 93.07  |
| rs184509201 | Type 2 diabetes | C | G | 0.982  | 0.19062036 | 0.02532014 | 0.04688834 | 0.04880571 | 56.68  |
| rs2102278   | Type 2 diabetes | G | A | 0.319  | 0.03922071 | 0.00739478 | 0.01718087 | 0.01421943 | 28.13  |
| rs2197973   | Type 2 diabetes | T | C | 0.538  | 0.03922071 | 0.00739478 | -0.0149036 | 0.01328468 | 28.13  |
| rs2237895   | Type 2 diabetes | C | A | 0.426  | 0.11332869 | 0.00680312 | 0.00378165 | 0.01343531 | 277.5  |
| rs2258238   | Type 2 diabetes | T | A | 0.104  | 0.09531018 | 0.01154505 | 0.03143189 | 0.02173994 | 68.15  |
| rs2268078   | Type 2 diabetes | A | G | 0.657  | 0.03922071 | 0.00732401 | -0.0222087 | 0.0138526  | 28.68  |
| rs2272163   | Type 2 diabetes | C | A | 0.618  | 0.03922071 | 0.00739478 | -0.0080942 | 0.01369039 | 28.13  |
| rs2283220   | Type 2 diabetes | A | G | 0.69   | 0.04879016 | 0.00732401 | 0.0157708  | 0.01451    | 44.38  |
| rs2307111   | Type 2 diabetes | T | C | 0.605  | 0.04879016 | 0.00725458 | 0.01425408 | 0.01359908 | 45.23  |
| rs243024    | Type 2 diabetes | A | G | 0.46   | 0.05826891 | 0.00481339 | 0.01398703 | 0.01336617 | 146.55 |
| rs2796441   | Type 2 diabetes | G | A | 0.592  | 0.06765865 | 0.00718645 | -0.0030291 | 0.01340754 | 88.64  |
| rs28505901  | Type 2 diabetes | G | A | 0.752  | 0.0861777  | 0.00936259 | 0.00797905 | 0.0154328  | 84.72  |
| rs2925979   | Type 2 diabetes | T | C | 0.3    | 0.04879016 | 0.00725458 | -0.0167858 | 0.01446812 | 45.23  |
| rs2972144   | Type 2 diabetes | G | A | 0.639  | 0.09531018 | 0.00698953 | -0.022699  | 0.01387043 | 185.94 |
| rs3111316   | Type 2 diabetes | A | G | 0.589  | 0.04879016 | 0.00732401 | -0.0286797 | 0.01344846 | 44.38  |
| rs329122    | Type 2 diabetes | A | G | 0.429  | 0.03922071 | 0.00490596 | -0.0202728 | 0.01347087 | 63.91  |
| rs340874    | Type 2 diabetes | C | T | 0.556  | 0.06765865 | 0.00718645 | -0.0023698 | 0.01338905 | 88.64  |

|            |                 |   |   |       |            |            |            |            |        |
|------------|-----------------|---|---|-------|------------|------------|------------|------------|--------|
| rs34584161 | Type 2 diabetes | A | G | 0.76  | 0.04879016 | 0.00732401 | 0.00268349 | 0.01560159 | 44.38  |
| rs34715063 | Type 2 diabetes | C | T | 0.124 | 0.09531018 | 0.01165052 | -0.0093863 | 0.01983364 | 66.92  |
| rs348330   | Type 2 diabetes | G | A | 0.361 | 0.04879016 | 0.00725458 | 0.00511701 | 0.01383766 | 45.23  |
| rs34965774 | Type 2 diabetes | A | G | 0.144 | 0.05826891 | 0.00962763 | 0.00854314 | 0.01984507 | 36.63  |
| rs35352848 | Type 2 diabetes | T | C | 0.788 | 0.06765865 | 0.00953764 | 0.00449352 | 0.01644166 | 50.32  |
| rs35895680 | Type 2 diabetes | C | A | 0.678 | 0.05826891 | 0.00725458 | 0.04619491 | 0.01425503 | 64.51  |
| rs35999103 | Type 2 diabetes | T | C | 0.155 | 0.04879016 | 0.00971935 | 0.00806663 | 0.01850013 | 25.2   |
| rs3751837  | Type 2 diabetes | T | C | 0.22  | 0.03922071 | 0.00732401 | 0.01085967 | 0.01608687 | 28.68  |
| rs3768321  | Type 2 diabetes | T | G | 0.2   | 0.0861777  | 0.00705396 | 0.04382013 | 0.01668616 | 149.25 |
| rs3798519  | Type 2 diabetes | C | A | 0.184 | 0.05826891 | 0.00962763 | -0.0179633 | 0.01734364 | 36.63  |
| rs3802177  | Type 2 diabetes | G | A | 0.685 | 0.10436002 | 0.00686415 | 0.02188992 | 0.01436025 | 231.15 |
| rs3845281  | Type 2 diabetes | G | A | 0.904 | 0.07696104 | 0.0094493  | 0.00066742 | 0.02241692 | 66.33  |
| rs3887925  | Type 2 diabetes | T | C | 0.547 | 0.06765865 | 0.00718645 | 0.00378221 | 0.01337046 | 88.64  |
| rs4238013  | Type 2 diabetes | C | T | 0.209 | 0.05826891 | 0.00725458 | 0.0204094  | 0.01667556 | 64.51  |
| rs429358   | Type 2 diabetes | T | C | 0.846 | 0.07696104 | 0.0094493  | -0.0124976 | 0.01835499 | 66.33  |
| rs4457053  | Type 2 diabetes | G | A | 0.304 | 0.05826891 | 0.00718645 | -0.001885  | 0.01425031 | 65.74  |
| rs4688760  | Type 2 diabetes | T | C | 0.684 | 0.03922071 | 0.00732401 | 0.02266315 | 0.01438389 | 28.68  |
| rs4709746  | Type 2 diabetes | C | T | 0.868 | 0.05826891 | 0.00962763 | 0.00797437 | 0.01959717 | 36.63  |
| rs474513   | Type 2 diabetes | A | G | 0.517 | 0.03922071 | 0.00490596 | -0.00304   | 0.0132874  | 63.91  |
| rs4804833  | Type 2 diabetes | A | G | 0.39  | 0.04879016 | 0.00732401 | -0.0135371 | 0.01363753 | 44.38  |
| rs4925109  | Type 2 diabetes | A | G | 0.316 | 0.04879016 | 0.00732401 | 0.00656254 | 0.01448923 | 44.38  |
| rs4929965  | Type 2 diabetes | A | G | 0.383 | 0.06765865 | 0.00711959 | -0.0125712 | 0.01368411 | 90.31  |
| rs4932265  | Type 2 diabetes | T | C | 0.267 | 0.06765865 | 0.00718645 | -0.0124769 | 0.01505525 | 88.64  |
| rs4946812  | Type 2 diabetes | G | A | 0.674 | 0.03922071 | 0.00490596 | -0.0292896 | 0.01422963 | 63.91  |
| rs4977213  | Type 2 diabetes | C | T | 0.375 | 0.04879016 | 0.00725458 | -0.0019847 | 0.0136653  | 45.23  |
| rs505922   | Type 2 diabetes | C | T | 0.332 | 0.04879016 | 0.00732401 | 0.03995873 | 0.01431991 | 44.38  |
| rs5213     | Type 2 diabetes | C | T | 0.362 | 0.06765865 | 0.00711959 | -0.0097381 | 0.01397663 | 90.31  |
| rs539515   | Type 2 diabetes | C | A | 0.198 | 0.04879016 | 0.00725458 | -0.0023401 | 0.01636168 | 45.23  |

|            |                 |   |   |        |            |            |            |            |        |
|------------|-----------------|---|---|--------|------------|------------|------------|------------|--------|
| rs55653563 | Type 2 diabetes | A | C | 0.732  | 0.03922071 | 0.00732401 | 0.00078328 | 0.01504942 | 28.68  |
| rs56337234 | Type 2 diabetes | C | T | 0.503  | 0.05826891 | 0.00725458 | 0.00341986 | 0.01324798 | 64.51  |
| rs56348580 | Type 2 diabetes | G | C | 0.689  | 0.04879016 | 0.00725458 | -0.0136673 | 0.01440385 | 45.23  |
| rs58432198 | Type 2 diabetes | C | T | 0.881  | 0.06765865 | 0.00953764 | -0.0363978 | 0.0207554  | 50.32  |
| rs58730668 | Type 2 diabetes | T | C | 0.858  | 0.06765865 | 0.00953764 | 0.02002138 | 0.01913658 | 50.32  |
| rs601945   | Type 2 diabetes | G | A | 0.178  | 0.05826891 | 0.00962763 | -0.0274028 | 0.01687357 | 36.63  |
| rs60276348 | Type 2 diabetes | T | C | 0.14   | 0.04879016 | 0.00971935 | -0.0043367 | 0.01953753 | 25.2   |
| rs61676547 | Type 2 diabetes | C | G | 0.192  | 0.05826891 | 0.00725458 | -0.0006467 | 0.01706069 | 64.51  |
| rs62007683 | Type 2 diabetes | G | T | 0.653  | 0.03922071 | 0.00739478 | -0.0080015 | 0.01397479 | 28.13  |
| rs62080313 | Type 2 diabetes | C | T | 0.123  | 0.05826891 | 0.00962763 | -0.0066121 | 0.01993596 | 36.63  |
| rs62107261 | Type 2 diabetes | T | C | 0.954  | 0.11332869 | 0.01602064 | 0.0397289  | 0.03104192 | 50.04  |
| rs62271373 | Type 2 diabetes | A | T | 0.0553 | 0.0861777  | 0.01404586 | 0.00949733 | 0.02857647 | 37.64  |
| rs6458354  | Type 2 diabetes | C | T | 0.289  | 0.04879016 | 0.00725458 | -0.0084827 | 0.01457595 | 45.23  |
| rs6459733  | Type 2 diabetes | G | C | 0.673  | 0.05826891 | 0.00481339 | -0.0421878 | 0.01405593 | 146.55 |
| rs6518681  | Type 2 diabetes | G | A | 0.914  | 0.0861777  | 0.01175794 | -0.0005226 | 0.02302557 | 53.72  |
| rs6600191  | Type 2 diabetes | T | C | 0.825  | 0.05826891 | 0.00718645 | -0.0137984 | 0.01724826 | 65.74  |
| rs67232546 | Type 2 diabetes | T | C | 0.207  | 0.05826891 | 0.00725458 | -0.0071888 | 0.01633055 | 64.51  |
| rs6780171  | Type 2 diabetes | A | T | 0.314  | 0.13102826 | 0.00895187 | -0.0099502 | 0.01432352 | 214.24 |
| rs6821438  | Type 2 diabetes | A | G | 0.534  | 0.03922071 | 0.00732401 | 0.02234374 | 0.013269   | 28.68  |
| rs6976111  | Type 2 diabetes | A | C | 0.313  | 0.03922071 | 0.00732401 | -0.0255956 | 0.01457975 | 28.68  |
| rs7022807  | Type 2 diabetes | G | A | 0.401  | 0.03922071 | 0.00490596 | 0.02185002 | 0.01356154 | 63.91  |
| rs702634   | Type 2 diabetes | A | G | 0.69   | 0.04879016 | 0.00725458 | 0.00951983 | 0.01441251 | 45.23  |
| rs71372253 | Type 2 diabetes | C | T | 0.0642 | 0.07696104 | 0.01186735 | -0.0233105 | 0.02724902 | 42.06  |
| rs7178762  | Type 2 diabetes | C | T | 0.46   | 0.03922071 | 0.00490596 | -0.0298761 | 0.01337369 | 63.91  |
| rs7222481  | Type 2 diabetes | C | G | 0.324  | 0.03922071 | 0.00490596 | 0.00097955 | 0.01411473 | 63.91  |
| rs7240767  | Type 2 diabetes | C | T | 0.376  | 0.03922071 | 0.00739478 | -0.0046132 | 0.01363004 | 28.13  |
| rs72802342 | Type 2 diabetes | C | A | 0.923  | 0.15700375 | 0.01308502 | 0.00463784 | 0.02526857 | 143.97 |
| rs72926932 | Type 2 diabetes | C | A | 0.0839 | 0.0861777  | 0.01165052 | -0.0180445 | 0.02418134 | 54.71  |

|            |                 |   |   |        |            |            |            |            |        |
|------------|-----------------|---|---|--------|------------|------------|------------|------------|--------|
| rs738408   | Type 2 diabetes | T | C | 0.226  | 0.04879016 | 0.00971935 | -0.027318  | 0.01611089 | 25.2   |
| rs7629630  | Type 2 diabetes | A | T | 0.857  | 0.04879016 | 0.00971935 | 0.00476899 | 0.01913164 | 25.2   |
| rs7669833  | Type 2 diabetes | T | A | 0.705  | 0.05826891 | 0.00725458 | 0.00994218 | 0.01467835 | 64.51  |
| rs76895963 | Type 2 diabetes | T | G | 0.98   | 0.48242615 | 0.02671198 | -0.0645826 | 0.05143181 | 326.17 |
| rs7719891  | Type 2 diabetes | G | A | 0.259  | 0.03922071 | 0.00732401 | 0.01630429 | 0.01543121 | 28.68  |
| rs77464186 | Type 2 diabetes | A | C | 0.836  | 0.10436002 | 0.00919386 | -0.0504054 | 0.01825696 | 128.85 |
| rs7756992  | Type 2 diabetes | G | A | 0.274  | 0.13976194 | 0.00887401 | 0.0103845  | 0.01501648 | 248.05 |
| rs77864822 | Type 2 diabetes | A | G | 0.932  | 0.07696104 | 0.01417598 | 0.00608931 | 0.02718466 | 29.47  |
| rs7903146  | Type 2 diabetes | T | C | 0.295  | 0.31481074 | 0.00744876 | 0.01589994 | 0.01461955 | 1786.2 |
| rs7987740  | Type 2 diabetes | T | C | 0.609  | 0.03922071 | 0.00739478 | -0.0154246 | 0.01360385 | 28.13  |
| rs8010382  | Type 2 diabetes | G | A | 0.421  | 0.03922071 | 0.00490596 | 0.01307088 | 0.01381267 | 63.91  |
| rs80147536 | Type 2 diabetes | A | T | 0.904  | 0.12221763 | 0.01123979 | 0.01400686 | 0.02199816 | 118.24 |
| rs8107974  | Type 2 diabetes | T | A | 0.0769 | 0.09531018 | 0.01165052 | -0.0062228 | 0.02497971 | 66.92  |
| rs878521   | Type 2 diabetes | A | G | 0.245  | 0.05826891 | 0.00725458 | -0.0133239 | 0.01532312 | 64.51  |
| rs9379084  | Type 2 diabetes | G | A | 0.887  | 0.10436002 | 0.01154505 | -0.0351087 | 0.0214353  | 81.71  |
| rs9494624  | Type 2 diabetes | A | G | 0.29   | 0.03922071 | 0.00732401 | -0.0059395 | 0.01477756 | 28.68  |
| rs9563615  | Type 2 diabetes | A | T | 0.71   | 0.04879016 | 0.00732401 | 0.01900185 | 0.01456155 | 44.38  |
| rs9687832  | Type 2 diabetes | A | G | 0.198  | 0.07696104 | 0.0094493  | -0.0319388 | 0.01639026 | 66.33  |
| rs9860730  | Type 2 diabetes | A | G | 0.704  | 0.05826891 | 0.00725458 | 0.01204026 | 0.01464659 | 64.51  |
| rs9873618  | Type 2 diabetes | G | A | 0.71   | 0.06765865 | 0.00718645 | 0.01211412 | 0.01459297 | 88.64  |
| rs9957145  | Type 2 diabetes | G | A | 0.829  | 0.04879016 | 0.00971935 | 0.01293339 | 0.01785345 | 25.2   |

EA: Effect allele; EAF: Effect allele frequency; Fstat: F statistics; OA: Other allele; SE: Standard error; SNP: Single nucleotide polymorphism



**Appendix 3: Information on the genetic instruments used in this Mendelian randomization study for the prostate cancer analyses in Prostate Cancer Association Group to Investigate Cancer Associated Alterations in the Genome consortium**

| SNP        | Exposure | EA | OA | EAF    | Beta/Log odds | SE     | Log odds | SE     | Fstat  |
|------------|----------|----|----|--------|---------------|--------|----------|--------|--------|
| rs1046896  | HbA1c    | T  | C  | 0.3162 | 0.028         | 0.0017 | 8.00E-04 | 0.0089 | 271.28 |
| rs11248914 | HbA1c    | T  | C  | 0.647  | 0.014         | 0.0019 | 2.00E-04 | 0.0089 | 54.29  |
| rs11558471 | HbA1c    | A  | G  | 0.6745 | 0.015         | 0.0017 | 0.0045   | 0.0087 | 77.85  |
| rs11964178 | HbA1c    | A  | G  | 0.5666 | 0.01          | 0.0016 | -0.0119  | 0.0082 | 39.06  |
| rs12621844 | HbA1c    | T  | C  | 0.5999 | 0.01          | 0.0018 | 0.0072   | 0.0083 | 30.86  |
| rs13134327 | HbA1c    | A  | G  | 0.3335 | 0.013         | 0.0017 | 8.00E-04 | 0.0088 | 58.48  |
| rs17509001 | HbA1c    | C  | T  | 0.1576 | 0.018         | 0.0023 | -0.031   | 0.0116 | 61.25  |
| rs17533903 | HbA1c    | A  | G  | 0.2428 | 0.015         | 0.0022 | 0.0141   | 0.0098 | 46.49  |
| rs2383208  | HbA1c    | A  | G  | 0.7992 | 0.014         | 0.0021 | -0.0104  | 0.0105 | 44.44  |
| rs282587   | HbA1c    | G  | A  | 0.1513 | 0.019         | 0.0027 | -0.0022  | 0.0126 | 49.52  |
| rs3782123  | HbA1c    | C  | A  | 0.3205 | 0.013         | 0.002  | 0.0057   | 0.009  | 42.25  |
| rs579459   | HbA1c    | C  | T  | 0.2389 | 0.011         | 0.0019 | 0.0062   | 0.0098 | 33.52  |
| rs592423   | HbA1c    | A  | C  | 0.4566 | 0.009         | 0.0017 | -0.0254  | 0.0081 | 28.03  |
| rs7040409  | HbA1c    | C  | G  | 0.8953 | 0.028         | 0.0037 | -0.025   | 0.0174 | 57.27  |
| rs7616006  | HbA1c    | A  | G  | 0.5744 | 0.01          | 0.0017 | -0.0104  | 0.0083 | 34.6   |
| rs8192675  | HbA1c    | T  | C  | 0.6906 | 0.011         | 0.0017 | 0.0259   | 0.0092 | 41.87  |
| rs857691   | HbA1c    | T  | C  | 0.2715 | 0.019         | 0.0019 | 0.0158   | 0.0094 | 100    |
| rs9818758  | HbA1c    | A  | G  | 0.2028 | 0.012         | 0.002  | -0.0216  | 0.0105 | 36     |
| rs9914988  | HbA1c    | A  | G  | 0.7877 | 0.013         | 0.002  | -0.0043  | 0.0101 | 42.25  |
| rs10276674 | Glucose  | C  | T  | 0.164  | 0.035         | 0.0049 | 0.0075   | 0.0106 | 51.02  |
| rs11558471 | Glucose  | A  | G  | 0.748  | 0.022         | 0.0033 | 0.0045   | 0.0087 | 44.44  |
| rs174549   | Glucose  | A  | G  | 0.296  | -0.021        | 0.0033 | -0.0026  | 0.0087 | 40.5   |
| rs4502156  | Glucose  | C  | T  | 0.42   | -0.019        | 0.0031 | 0.0082   | 0.0084 | 37.57  |
| rs6113722  | Glucose  | A  | G  | 0.04   | -0.046        | 0.008  | 0.0119   | 0.0211 | 33.06  |

|            |                 |   |   |       |            |            |          |        |        |
|------------|-----------------|---|---|-------|------------|------------|----------|--------|--------|
| rs780093   | Glucose         | C | T | 0.606 | 0.031      | 0.0032     | -0.0217  | 0.0081 | 93.85  |
| rs7945565  | Glucose         | A | G | 0.541 | 0.028      | 0.0031     | 6.00E-04 | 0.0082 | 81.58  |
| rs8192675  | Glucose         | C | T | 0.296 | -0.022     | 0.0034     | -0.0259  | 0.0092 | 41.87  |
| rs853787   | Glucose         | G | T | 0.367 | -0.065     | 0.0033     | 0.0104   | 0.0088 | 387.97 |
| rs9356744  | Glucose         | C | T | 0.308 | 0.019      | 0.0034     | -0.0015  | 0.0085 | 31.23  |
| rs983309   | Glucose         | G | T | 0.903 | -0.027     | 0.0046     | -0.0107  | 0.0126 | 34.45  |
| rs1005752  | Type 2 diabetes | A | C | 0.715 | 0.07696104 | 0.00705396 | 0.0034   | 0.0088 | 119.04 |
| rs10096633 | Type 2 diabetes | C | T | 0.877 | 0.06765865 | 0.00953764 | -0.0125  | 0.0122 | 50.32  |
| rs10097617 | Type 2 diabetes | T | C | 0.485 | 0.03922071 | 0.00732401 | 0.0032   | 0.008  | 28.68  |
| rs10193538 | Type 2 diabetes | T | G | 0.61  | 0.03922071 | 0.00739478 | 0.002    | 0.0083 | 28.13  |
| rs10195252 | Type 2 diabetes | T | C | 0.586 | 0.06765865 | 0.0047684  | 0.0075   | 0.008  | 201.33 |
| rs10228066 | Type 2 diabetes | T | C | 0.537 | 0.06765865 | 0.00711959 | -0.0049  | 0.0081 | 90.31  |
| rs10406431 | Type 2 diabetes | A | G | 0.563 | 0.04879016 | 0.00485923 | 0.0039   | 0.008  | 100.82 |
| rs1061810  | Type 2 diabetes | A | C | 0.288 | 0.04879016 | 0.00725458 | 0.0123   | 0.0089 | 45.23  |
| rs10750397 | Type 2 diabetes | A | G | 0.282 | 0.04879016 | 0.00725458 | 0.0222   | 0.0096 | 45.23  |
| rs10811660 | Type 2 diabetes | G | A | 0.828 | 0.2390169  | 0.0100844  | -0.0133  | 0.0106 | 561.77 |
| rs10938398 | Type 2 diabetes | A | G | 0.429 | 0.04879016 | 0.00732401 | 5.00E-04 | 0.0081 | 44.38  |
| rs10954772 | Type 2 diabetes | T | C | 0.314 | 0.03922071 | 0.00732401 | -0.0069  | 0.0089 | 28.68  |
| rs10974438 | Type 2 diabetes | C | A | 0.357 | 0.04879016 | 0.00725458 | 0.0161   | 0.0088 | 45.23  |
| rs11257655 | Type 2 diabetes | T | C | 0.218 | 0.0861777  | 0.00698953 | 0.0197   | 0.0098 | 152.02 |
| rs1127215  | Type 2 diabetes | C | T | 0.584 | 0.04879016 | 0.00485923 | -0.0023  | 0.0083 | 100.82 |
| rs11496066 | Type 2 diabetes | T | C | 0.818 | 0.07696104 | 0.01417598 | -0.0051  | 0.0102 | 29.47  |
| rs11680058 | Type 2 diabetes | A | G | 0.863 | 0.05826891 | 0.00962763 | -0.0333  | 0.0142 | 36.63  |
| rs11709077 | Type 2 diabetes | G | A | 0.877 | 0.13102826 | 0.01123979 | -0.0127  | 0.012  | 135.9  |
| rs11759026 | Type 2 diabetes | G | A | 0.232 | 0.06765865 | 0.00718645 | -0.0044  | 0.0096 | 88.64  |
| rs11842871 | Type 2 diabetes | G | T | 0.735 | 0.03922071 | 0.00732401 | 0.0034   | 0.0103 | 28.68  |
| rs12001437 | Type 2 diabetes | C | T | 0.372 | 0.03922071 | 0.00732401 | -0.0276  | 0.0083 | 28.68  |
| rs12140153 | Type 2 diabetes | G | T | 0.905 | 0.06765865 | 0.01197882 | -0.0079  | 0.0149 | 31.9   |

|             |                 |   |   |        |            |            |         |        |        |
|-------------|-----------------|---|---|--------|------------|------------|---------|--------|--------|
| rs1260326   | Type 2 diabetes | C | T | 0.607  | 0.06765865 | 0.0047684  | -0.0222 | 0.0082 | 201.33 |
| rs12640250  | Type 2 diabetes | C | A | 0.715  | 0.03922071 | 0.00490596 | -0.0086 | 0.009  | 63.91  |
| rs12719778  | Type 2 diabetes | T | C | 0.538  | 0.03922071 | 0.00490596 | 0.0017  | 0.0085 | 63.91  |
| rs1296328   | Type 2 diabetes | A | C | 0.446  | 0.03922071 | 0.00739478 | -0.0047 | 0.0082 | 28.13  |
| rs13041756  | Type 2 diabetes | C | T | 0.107  | 0.05826891 | 0.00962763 | -0.0184 | 0.0137 | 36.63  |
| rs13262861  | Type 2 diabetes | C | A | 0.829  | 0.06765865 | 0.00953764 | -0.0125 | 0.0108 | 50.32  |
| rs13426680  | Type 2 diabetes | A | G | 0.937  | 0.0861777  | 0.01175794 | 0.0294  | 0.0167 | 53.72  |
| rs1359790   | Type 2 diabetes | G | A | 0.72   | 0.0861777  | 0.00705396 | 0.0066  | 0.0092 | 149.25 |
| rs1377807   | Type 2 diabetes | C | G | 0.312  | 0.04879016 | 0.00725458 | -0.01   | 0.0088 | 45.23  |
| rs1412234   | Type 2 diabetes | C | T | 0.323  | 0.03922071 | 0.00732401 | 0.0041  | 0.0087 | 28.68  |
| rs141521721 | Type 2 diabetes | A | C | 0.0236 | 0.12221763 | 0.02041906 | 0.0395  | 0.0301 | 35.83  |
| rs145678014 | Type 2 diabetes | G | T | 0.957  | 0.10436002 | 0.01616572 | -0.0272 | 0.0214 | 41.68  |
| rs145904381 | Type 2 diabetes | T | C | 0.987  | 0.17395331 | 0.03004669 | -0.0344 | 0.0402 | 33.52  |
| rs1531583   | Type 2 diabetes | T | G | 0.0458 | 0.12221763 | 0.01587814 | -0.0207 | 0.0214 | 59.25  |
| rs1561927   | Type 2 diabetes | C | T | 0.269  | 0.03922071 | 0.00732401 | 0.0135  | 0.009  | 28.68  |
| rs1562396   | Type 2 diabetes | G | A | 0.319  | 0.05826891 | 0.00718645 | -0.0025 | 0.0092 | 65.74  |
| rs1580278   | Type 2 diabetes | C | A | 0.473  | 0.03922071 | 0.00490596 | 0.0075  | 0.0081 | 63.91  |
| rs1708302   | Type 2 diabetes | C | T | 0.512  | 0.09531018 | 0.00698953 | -0.0134 | 0.0079 | 185.94 |
| rs17122772  | Type 2 diabetes | G | C | 0.228  | 0.03922071 | 0.00732401 | 0.0066  | 0.0102 | 28.68  |
| rs17168486  | Type 2 diabetes | T | C | 0.181  | 0.06765865 | 0.00711959 | 0.0082  | 0.0107 | 90.31  |
| rs17684074  | Type 2 diabetes | G | C | 0.74   | 0.03922071 | 0.00732401 | -0.003  | 0.0096 | 28.68  |
| rs17772814  | Type 2 diabetes | G | A | 0.915  | 0.07696104 | 0.01417598 | -0.0273 | 0.0145 | 29.47  |
| rs17791513  | Type 2 diabetes | A | G | 0.932  | 0.09531018 | 0.01154505 | 0.0143  | 0.0158 | 68.15  |
| rs1783541   | Type 2 diabetes | T | C | 0.204  | 0.05826891 | 0.00718645 | 0.0265  | 0.0106 | 65.74  |
| rs2102278   | Type 2 diabetes | G | A | 0.319  | 0.03922071 | 0.00739478 | 0.0046  | 0.0088 | 28.13  |
| rs2237895   | Type 2 diabetes | C | A | 0.426  | 0.11332869 | 0.00680312 | -0.0016 | 0.0087 | 277.5  |
| rs2268078   | Type 2 diabetes | A | G | 0.657  | 0.03922071 | 0.00732401 | -0.0225 | 0.0085 | 28.68  |
| rs2272163   | Type 2 diabetes | C | A | 0.618  | 0.03922071 | 0.00739478 | -0.0048 | 0.0088 | 28.13  |

|            |                 |   |   |       |            |            |          |        |        |
|------------|-----------------|---|---|-------|------------|------------|----------|--------|--------|
| rs2283220  | Type 2 diabetes | A | G | 0.69  | 0.04879016 | 0.00732401 | -0.0033  | 0.0092 | 44.38  |
| rs243024   | Type 2 diabetes | A | G | 0.46  | 0.05826891 | 0.00481339 | 0.0037   | 0.008  | 146.55 |
| rs2796441  | Type 2 diabetes | G | A | 0.592 | 0.06765865 | 0.00718645 | 2.00E-04 | 0.0087 | 88.64  |
| rs28505901 | Type 2 diabetes | G | A | 0.752 | 0.0861777  | 0.00936259 | -0.0194  | 0.01   | 84.72  |
| rs2972144  | Type 2 diabetes | G | A | 0.639 | 0.09531018 | 0.00698953 | 0.0094   | 0.0084 | 185.94 |
| rs3111316  | Type 2 diabetes | A | G | 0.589 | 0.04879016 | 0.00732401 | -0.0136  | 0.0084 | 44.38  |
| rs340874   | Type 2 diabetes | C | T | 0.556 | 0.06765865 | 0.00718645 | 0.0041   | 0.0084 | 88.64  |
| rs34584161 | Type 2 diabetes | A | G | 0.76  | 0.04879016 | 0.00732401 | -0.0083  | 0.0095 | 44.38  |
| rs34715063 | Type 2 diabetes | C | T | 0.124 | 0.09531018 | 0.01165052 | 0.0068   | 0.0136 | 66.92  |
| rs348330   | Type 2 diabetes | G | A | 0.361 | 0.04879016 | 0.00725458 | -0.0111  | 0.0089 | 45.23  |
| rs35352848 | Type 2 diabetes | T | C | 0.788 | 0.06765865 | 0.00953764 | -0.0149  | 0.0098 | 50.32  |
| rs35895680 | Type 2 diabetes | C | A | 0.678 | 0.05826891 | 0.00725458 | -0.0039  | 0.0089 | 64.51  |
| rs35999103 | Type 2 diabetes | T | C | 0.155 | 0.04879016 | 0.00971935 | 0.0078   | 0.0118 | 25.2   |
| rs3751837  | Type 2 diabetes | T | C | 0.22  | 0.03922071 | 0.00732401 | 0.0208   | 0.0102 | 28.68  |
| rs3768321  | Type 2 diabetes | T | G | 0.2   | 0.0861777  | 0.00705396 | 0.0179   | 0.0106 | 149.25 |
| rs3798519  | Type 2 diabetes | C | A | 0.184 | 0.05826891 | 0.00962763 | -0.0056  | 0.0102 | 36.63  |
| rs3802177  | Type 2 diabetes | G | A | 0.685 | 0.10436002 | 0.00686415 | 0.0039   | 0.0087 | 231.15 |
| rs3887925  | Type 2 diabetes | T | C | 0.547 | 0.06765865 | 0.00718645 | 0.0024   | 0.0082 | 88.64  |
| rs429358   | Type 2 diabetes | T | C | 0.846 | 0.07696104 | 0.0094493  | 0.0374   | 0.0117 | 66.33  |
| rs4688760  | Type 2 diabetes | T | C | 0.684 | 0.03922071 | 0.00732401 | 0.008    | 0.0087 | 28.68  |
| rs4804833  | Type 2 diabetes | A | G | 0.39  | 0.04879016 | 0.00732401 | -0.0185  | 0.0082 | 44.38  |
| rs4925109  | Type 2 diabetes | A | G | 0.316 | 0.04879016 | 0.00732401 | 0.0294   | 0.0085 | 44.38  |
| rs4929965  | Type 2 diabetes | A | G | 0.383 | 0.06765865 | 0.00711959 | 0.0592   | 0.0082 | 90.31  |
| rs4932265  | Type 2 diabetes | T | C | 0.267 | 0.06765865 | 0.00718645 | 0.0286   | 0.0099 | 88.64  |
| rs4946812  | Type 2 diabetes | G | A | 0.674 | 0.03922071 | 0.00490596 | 0.0109   | 0.0094 | 63.91  |
| rs4977213  | Type 2 diabetes | C | T | 0.375 | 0.04879016 | 0.00725458 | 0        | 0.0092 | 45.23  |
| rs5213     | Type 2 diabetes | C | T | 0.362 | 0.06765865 | 0.00711959 | 7.00E-04 | 0.0083 | 90.31  |
| rs539515   | Type 2 diabetes | C | A | 0.198 | 0.04879016 | 0.00725458 | 0.014    | 0.0101 | 45.23  |

|            |                 |   |   |        |            |            |         |        |        |
|------------|-----------------|---|---|--------|------------|------------|---------|--------|--------|
| rs55653563 | Type 2 diabetes | A | C | 0.732  | 0.03922071 | 0.00732401 | -0.0063 | 0.0091 | 28.68  |
| rs56337234 | Type 2 diabetes | C | T | 0.503  | 0.05826891 | 0.00725458 | 0.0071  | 0.0085 | 64.51  |
| rs58432198 | Type 2 diabetes | C | T | 0.881  | 0.06765865 | 0.00953764 | -0.0218 | 0.0129 | 50.32  |
| rs58730668 | Type 2 diabetes | T | C | 0.858  | 0.06765865 | 0.00953764 | 0.0065  | 0.0121 | 50.32  |
| rs601945   | Type 2 diabetes | G | A | 0.178  | 0.05826891 | 0.00962763 | 0.0616  | 0.0104 | 36.63  |
| rs60276348 | Type 2 diabetes | T | C | 0.14   | 0.04879016 | 0.00971935 | -0.0342 | 0.0131 | 25.2   |
| rs61676547 | Type 2 diabetes | C | G | 0.192  | 0.05826891 | 0.00725458 | -0.0285 | 0.0099 | 64.51  |
| rs62080313 | Type 2 diabetes | C | T | 0.123  | 0.05826891 | 0.00962763 | 0.0114  | 0.0122 | 36.63  |
| rs62107261 | Type 2 diabetes | T | C | 0.954  | 0.11332869 | 0.01602064 | -0.0472 | 0.0232 | 50.04  |
| rs62271373 | Type 2 diabetes | A | T | 0.0553 | 0.0861777  | 0.01404586 | 0.0082  | 0.0209 | 37.64  |
| rs6458354  | Type 2 diabetes | C | T | 0.289  | 0.04879016 | 0.00725458 | -0.0173 | 0.0088 | 45.23  |
| rs6459733  | Type 2 diabetes | G | C | 0.673  | 0.05826891 | 0.00481339 | -0.0084 | 0.0086 | 146.55 |
| rs6600191  | Type 2 diabetes | T | C | 0.825  | 0.05826891 | 0.00718645 | -0.0068 | 0.0108 | 65.74  |
| rs67232546 | Type 2 diabetes | T | C | 0.207  | 0.05826891 | 0.00725458 | -0.0039 | 0.0104 | 64.51  |
| rs6780171  | Type 2 diabetes | A | T | 0.314  | 0.13102826 | 0.00895187 | -0.0165 | 0.0086 | 214.24 |
| rs6821438  | Type 2 diabetes | A | G | 0.534  | 0.03922071 | 0.00732401 | -0.0271 | 0.008  | 28.68  |
| rs6976111  | Type 2 diabetes | A | C | 0.313  | 0.03922071 | 0.00732401 | 0.0053  | 0.0088 | 28.68  |
| rs7022807  | Type 2 diabetes | G | A | 0.401  | 0.03922071 | 0.00490596 | 0.0528  | 0.0081 | 63.91  |
| rs7178762  | Type 2 diabetes | C | T | 0.46   | 0.03922071 | 0.00490596 | -0.0025 | 0.0081 | 63.91  |
| rs7222481  | Type 2 diabetes | C | G | 0.324  | 0.03922071 | 0.00490596 | 0.0015  | 0.009  | 63.91  |
| rs7240767  | Type 2 diabetes | C | T | 0.376  | 0.03922071 | 0.00739478 | 0.007   | 0.0084 | 28.13  |
| rs72926932 | Type 2 diabetes | C | A | 0.0839 | 0.0861777  | 0.01165052 | 0.0417  | 0.0145 | 54.71  |
| rs7629630  | Type 2 diabetes | A | T | 0.857  | 0.04879016 | 0.00971935 | -0.0132 | 0.0121 | 25.2   |
| rs7669833  | Type 2 diabetes | T | A | 0.705  | 0.05826891 | 0.00725458 | -0.0032 | 0.009  | 64.51  |
| rs77464186 | Type 2 diabetes | A | C | 0.836  | 0.10436002 | 0.00919386 | -0.0025 | 0.011  | 128.85 |
| rs7987740  | Type 2 diabetes | T | C | 0.609  | 0.03922071 | 0.00739478 | 0.0077  | 0.0085 | 28.13  |
| rs80147536 | Type 2 diabetes | A | T | 0.904  | 0.12221763 | 0.01123979 | 0.0521  | 0.0137 | 118.24 |
| rs8107974  | Type 2 diabetes | T | A | 0.0769 | 0.09531018 | 0.01165052 | 0.0085  | 0.0149 | 66.92  |

|           |                 |   |   |       |            |            |         |        |       |
|-----------|-----------------|---|---|-------|------------|------------|---------|--------|-------|
| rs878521  | Type 2 diabetes | A | G | 0.245 | 0.05826891 | 0.00725458 | -0.015  | 0.0098 | 64.51 |
| rs9494624 | Type 2 diabetes | A | G | 0.29  | 0.03922071 | 0.00732401 | 0.0047  | 0.0094 | 28.68 |
| rs9563615 | Type 2 diabetes | A | T | 0.71  | 0.04879016 | 0.00732401 | -0.0052 | 0.0091 | 44.38 |
| rs9860730 | Type 2 diabetes | A | G | 0.704 | 0.05826891 | 0.00725458 | 0.004   | 0.0088 | 64.51 |
| rs9873618 | Type 2 diabetes | G | A | 0.71  | 0.06765865 | 0.00718645 | 0.0277  | 0.0093 | 88.64 |
| rs9957145 | Type 2 diabetes | G | A | 0.829 | 0.04879016 | 0.00971935 | 0.0013  | 0.0106 | 25.2  |

EA: Effect allele; EAF: Effect allele frequency; Fstat: F statistics; OA: Other allele; SE: Standard error; SNP: Single nucleotide polymorphism

**Appendix 4: Information on the genetic instruments used in this Mendelian randomization study related to AMPK**

| SNP        | EA | OA | HbA1c (MAGIC) |          |        | Breast Cancer (Overall) BCAC |        | Breast Cancer (ER +) BCAC |        | Breast Cancer (ER -) BCAC |        | Breast Cancer (Overall) UK Biobank |             | Prostate Cancer PRACTICAL |        |
|------------|----|----|---------------|----------|--------|------------------------------|--------|---------------------------|--------|---------------------------|--------|------------------------------------|-------------|---------------------------|--------|
|            |    |    | EAF           | Beta (%) | SE     | Log odds                     | SE     | Log odds                  | SE     | Log odds                  | SE     | Log odds                           | SE          | Log odds                  | SE     |
| rs10257529 | A  | G  | 0.531         | 0.0058   | 0.0023 | 0.0043                       | 0.007  | 0.0046                    | 0.0083 | -0.0033                   | 0.0126 | -0.007032617                       | 0.013281095 | 0.0079                    | 0.0089 |
| rs10277859 | C  | T  | 0.186         | 0.0084   | 0.0023 | 0.0057                       | 0.0079 | -2.00E-04                 | 0.0094 | 0.0049                    | 0.0144 | 0.010414709                        | 0.017124282 | 0.0072                    | 0.0102 |
| rs17643028 | A  | C  | 0.2           | 0.0058   | 0.0025 | -0.0045                      | 0.0094 | 0.0068                    | 0.0112 | -0.0234                   | 0.0169 | 0.000422096                        | 0.019050005 | 0.0092                    | 0.0122 |
| rs2727527  | A  | C  | 0.741         | -0.0056  | 0.0021 | 0.0078                       | 0.0072 | 0.009                     | 0.0085 | 0.0115                    | 0.013  | -0.021820352                       | 0.014643452 | 0.0057                    | 0.0091 |
| rs2727565  | A  | C  | 0.223         | 0.0046   | 0.0022 | -1.00E-04                    | 0.0077 | -0.0077                   | 0.0092 | 0.0027                    | 0.0139 | 0.017616318                        | 0.015192597 | -0.0037                   | 0.0097 |
| rs2796529  | G  | T  | 0.881         | -0.0069  | 0.0027 | 0.0129                       | 0.0099 | 0.0172                    | 0.0119 | -0.026                    | 0.0176 | 0.015720451                        | 0.019849512 | 7.00E-04                  | 0.0126 |
| rs6464160  | G  | T  | 0.692         | -0.0044  | 0.0019 | 0.0053                       | 0.0067 | 0.0049                    | 0.008  | 0.0253                    | 0.0122 | -0.002236648                       | 0.014438062 | -0.0144                   | 0.0087 |
| rs6464161  | C  | T  | 0.325         | 0.0047   | 0.002  | -0.0089                      | 0.0066 | -0.0126                   | 0.0078 | -0.0126                   | 0.012  | 0.024936791                        | 0.014041278 | 0.0078                    | 0.0085 |
| rs6593738  | C  | T  | 0.584         | -0.0087  | 0.0036 | -0.002                       | 0.0065 | 3.00E-04                  | 0.0077 | 0.0111                    | 0.0116 | 0.017215619                        | 0.013546254 | -0.0073                   | 0.0083 |

AMPK: AMP-activated protein kinase; BCAC: Breast cancer association consortium; EA: Effect allele; EAF: Effect allele frequency; MAGIC: Meta-Analyses of Glucose and Insulin-related traits Consortium; OA: Other allele; SE: Standard error; SNP: Single nucleotide polymorphism; PRACTICAL: Prostate Cancer Association Group to Investigate Cancer Associated Alterations in the Genome consortium

**Supplemental Figure 1: Framework of Mendelian randomization design in this study**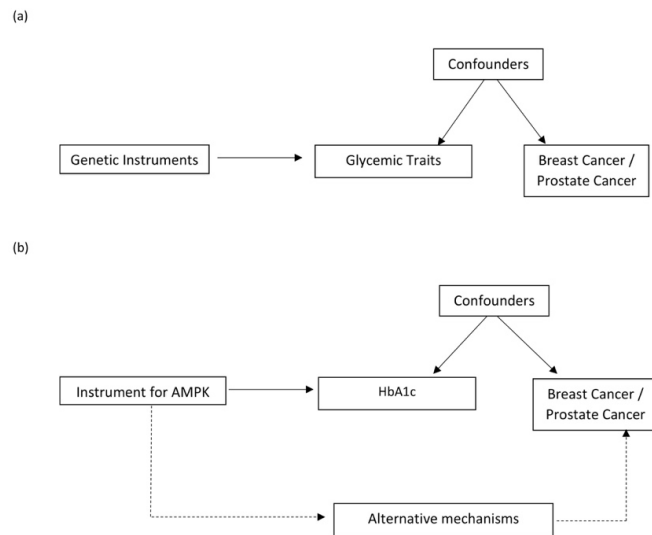

Supplement: bmjdrc-2019-000872supp001.pdf [file bmjdrc-2019-000872supp001.pdf]
